# Supplementary material for: Recurrent somatic mutations reveal new insights into consequences of mutagenic processes in cancer
Source: PubMed Central journal article supplement (PMC6901237; doi:10.1371/journal.pcbi.1007496), 2019-11-25

Biliary-AdenoCA

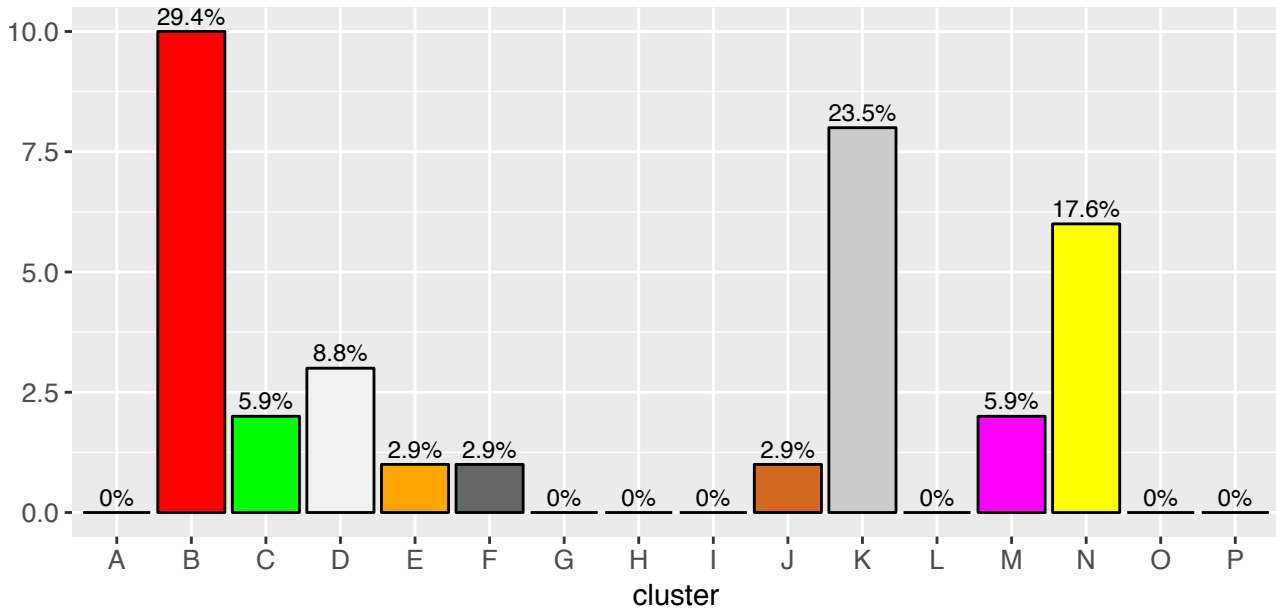

Bladder-TCC

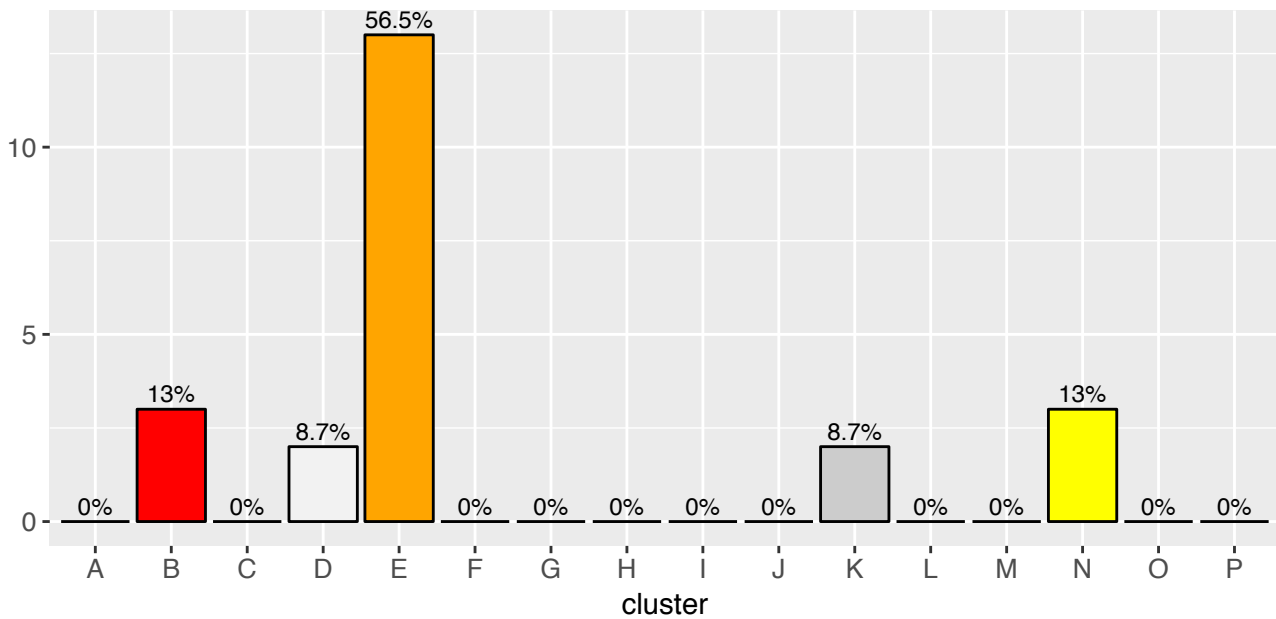

### Bone-Benign

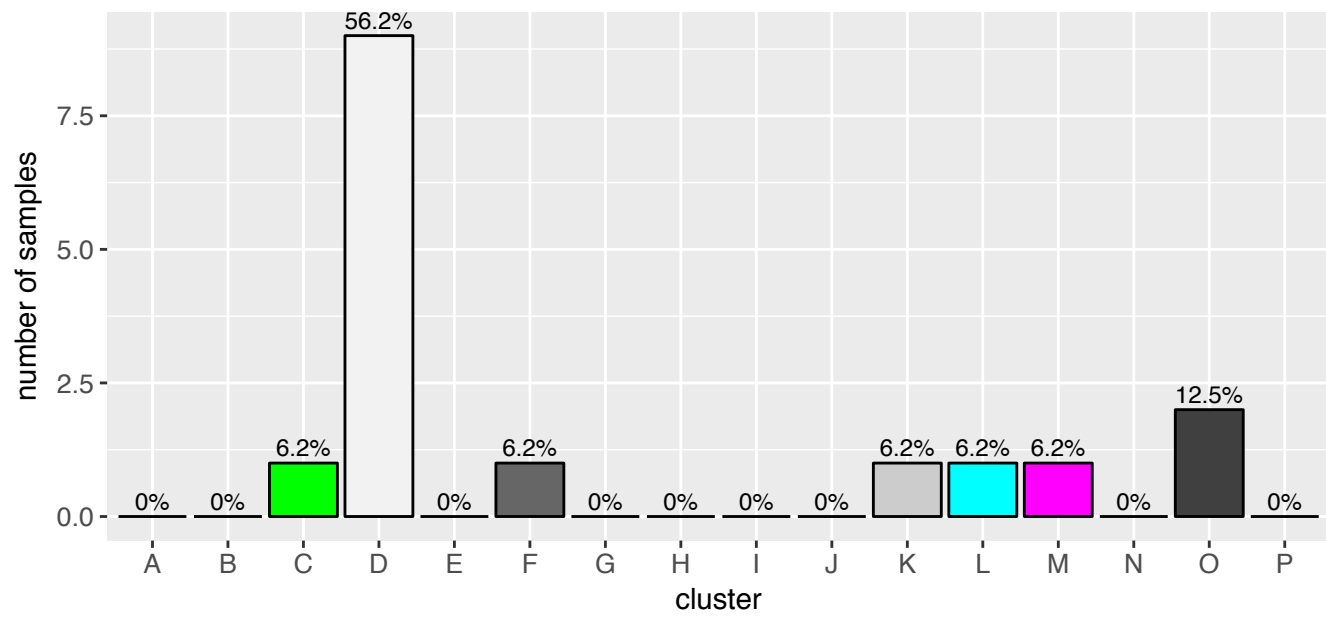

### Bone-Epith

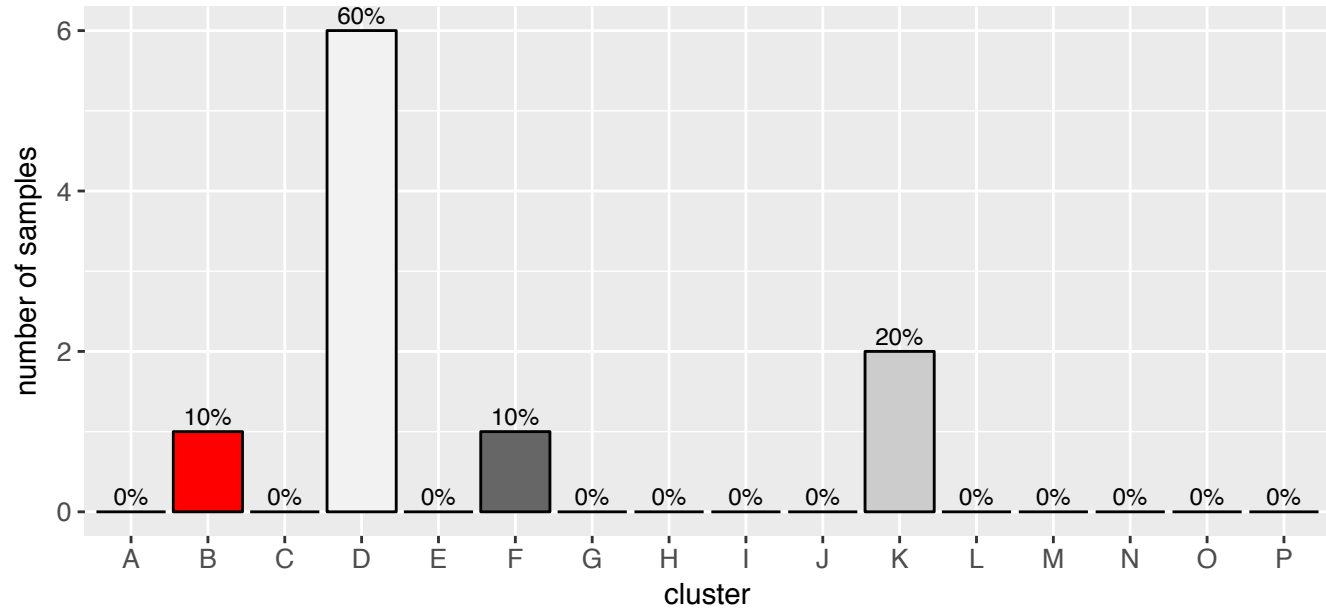

Bone-Osteosarc

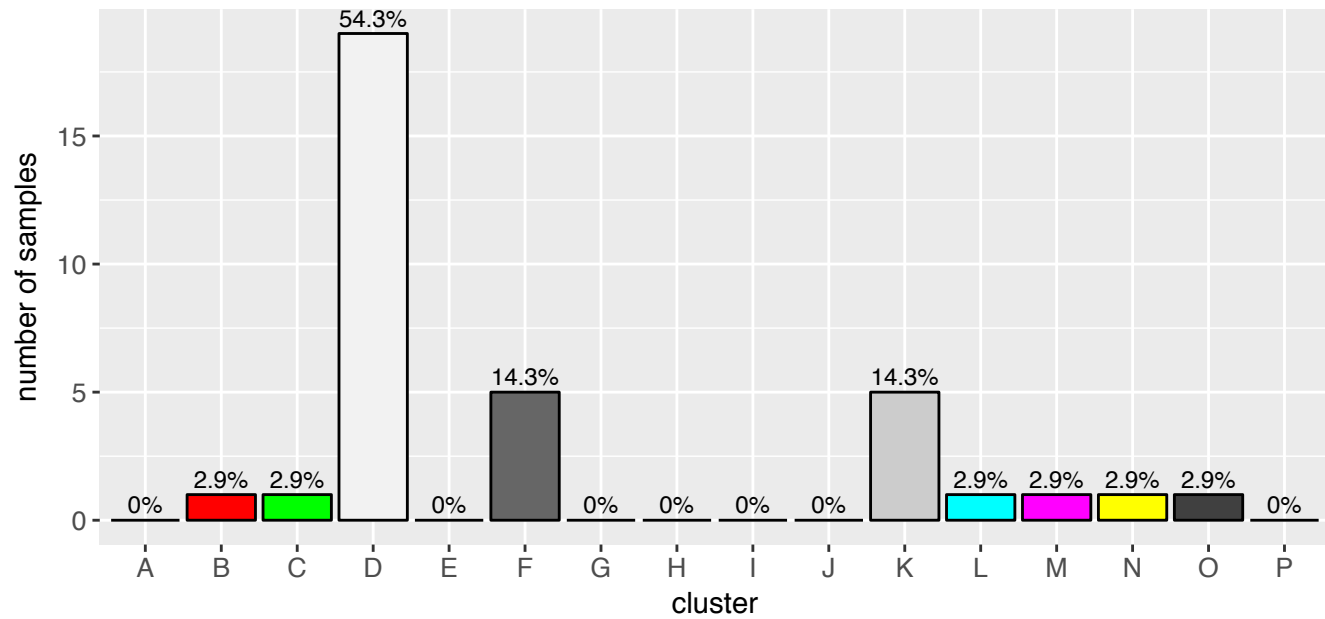

Breast-AdenoCA

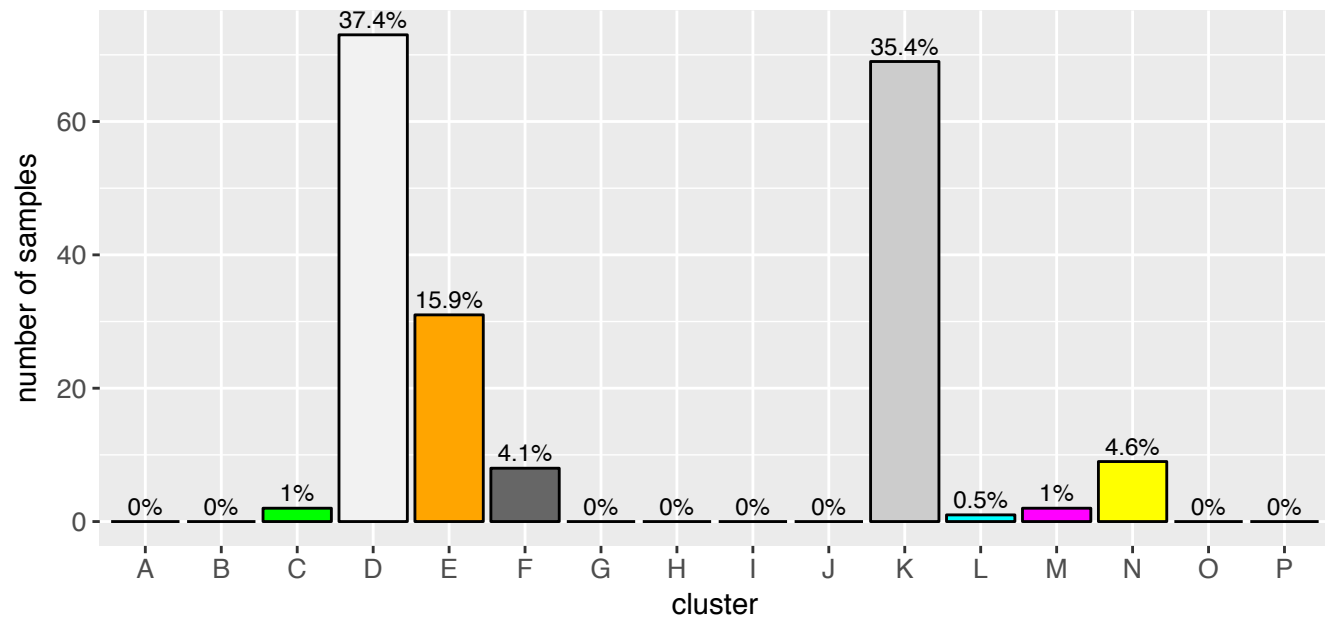

Breast-DCIS

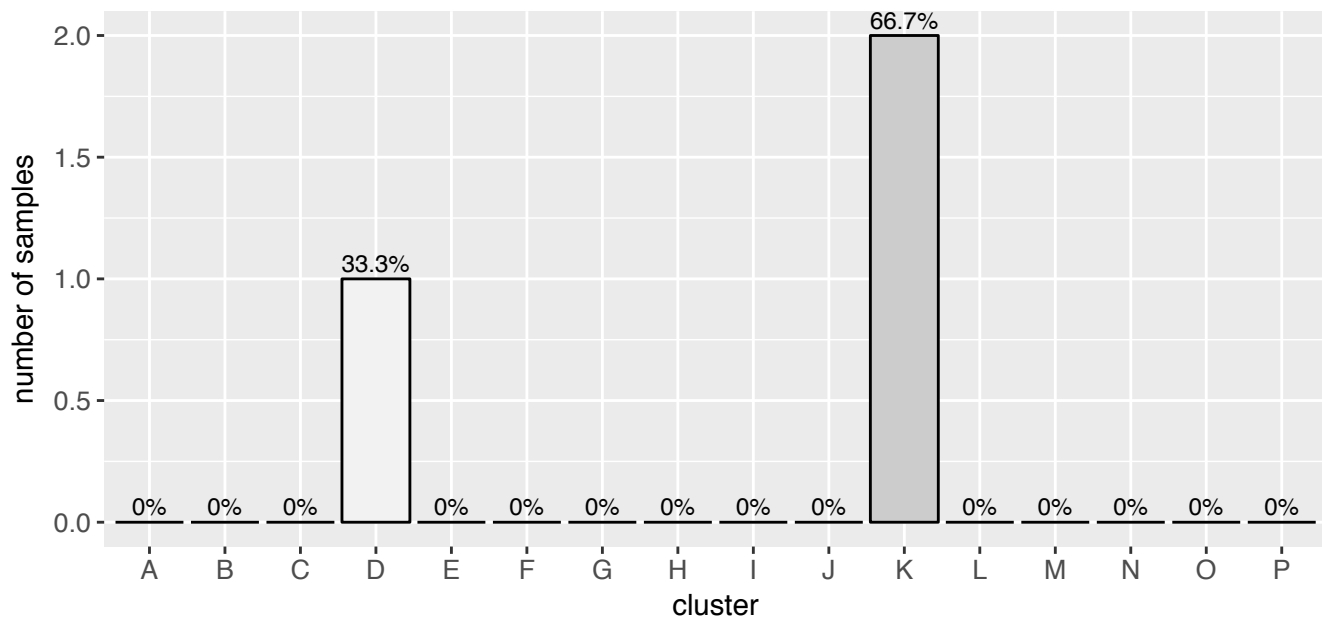

Breast-LobularCA

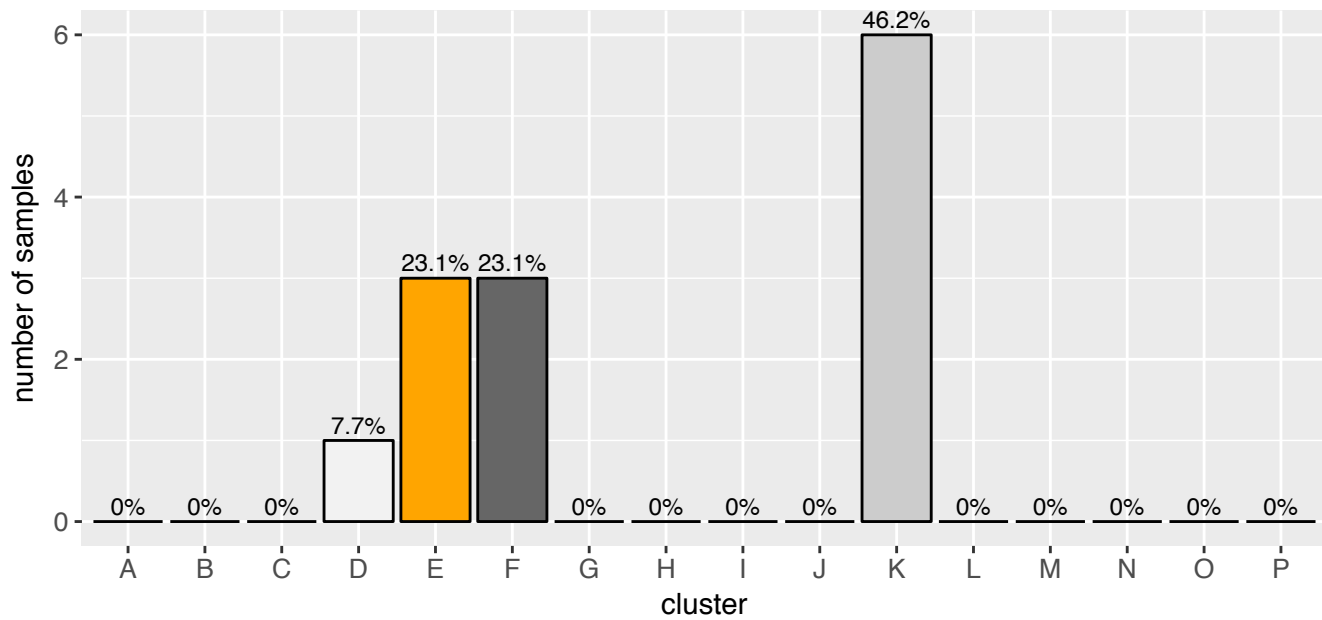

Cervix-AdenoCA

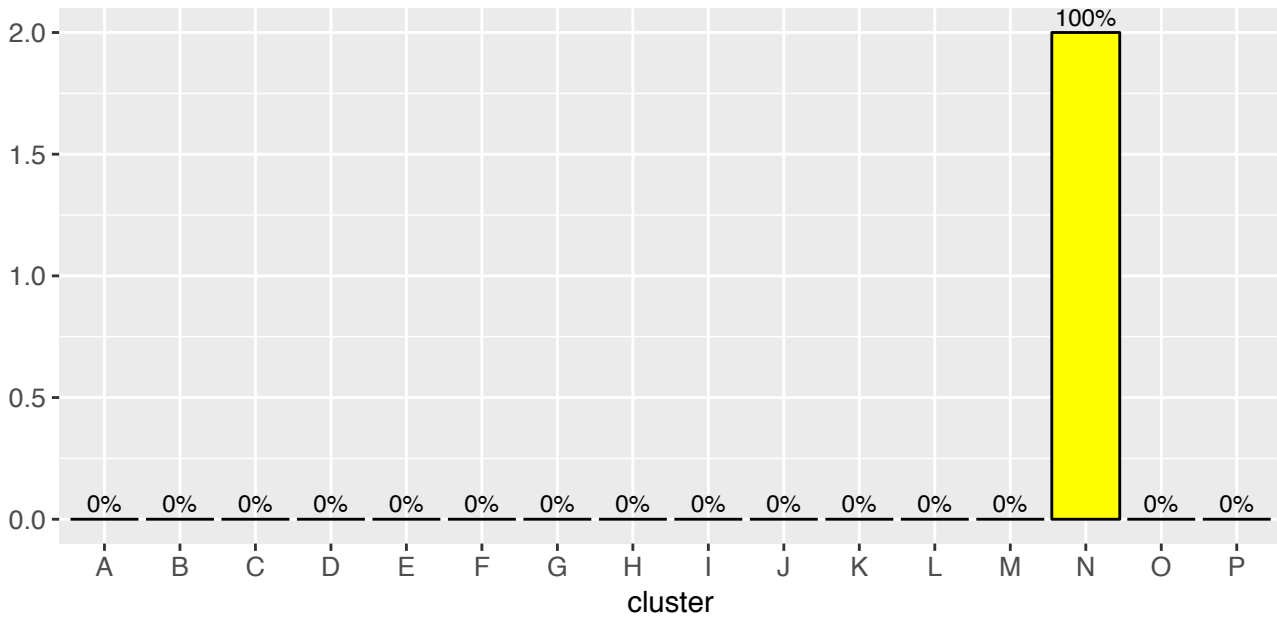

Cervix-SCC

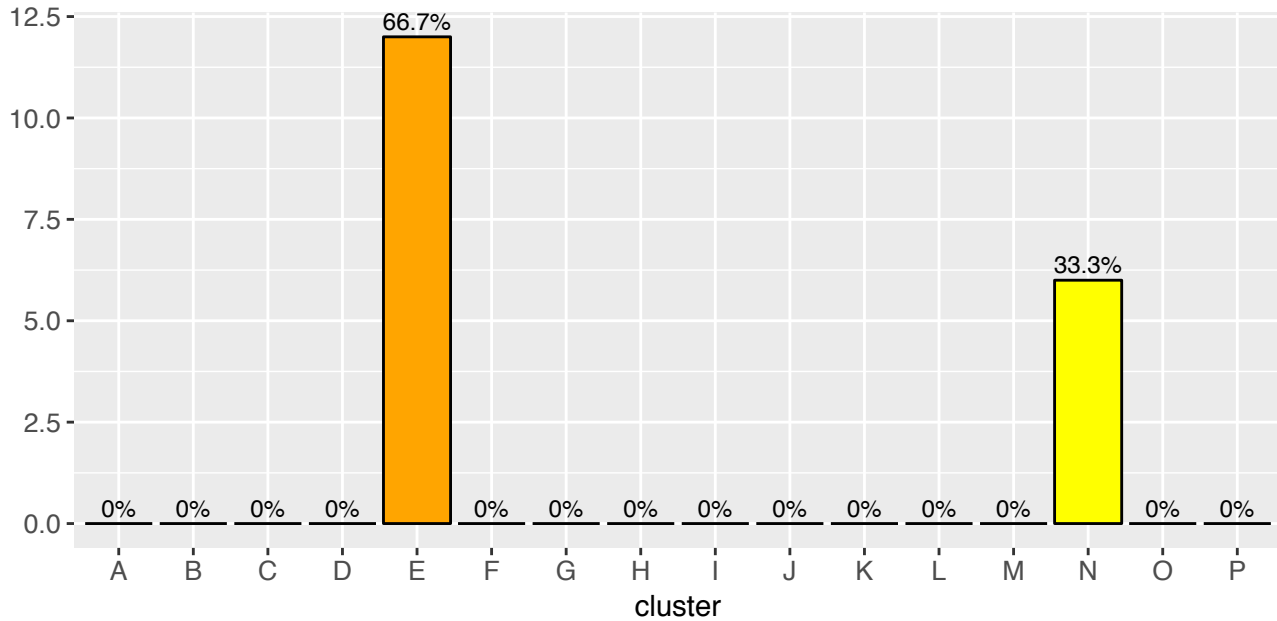

### CNS-GBM

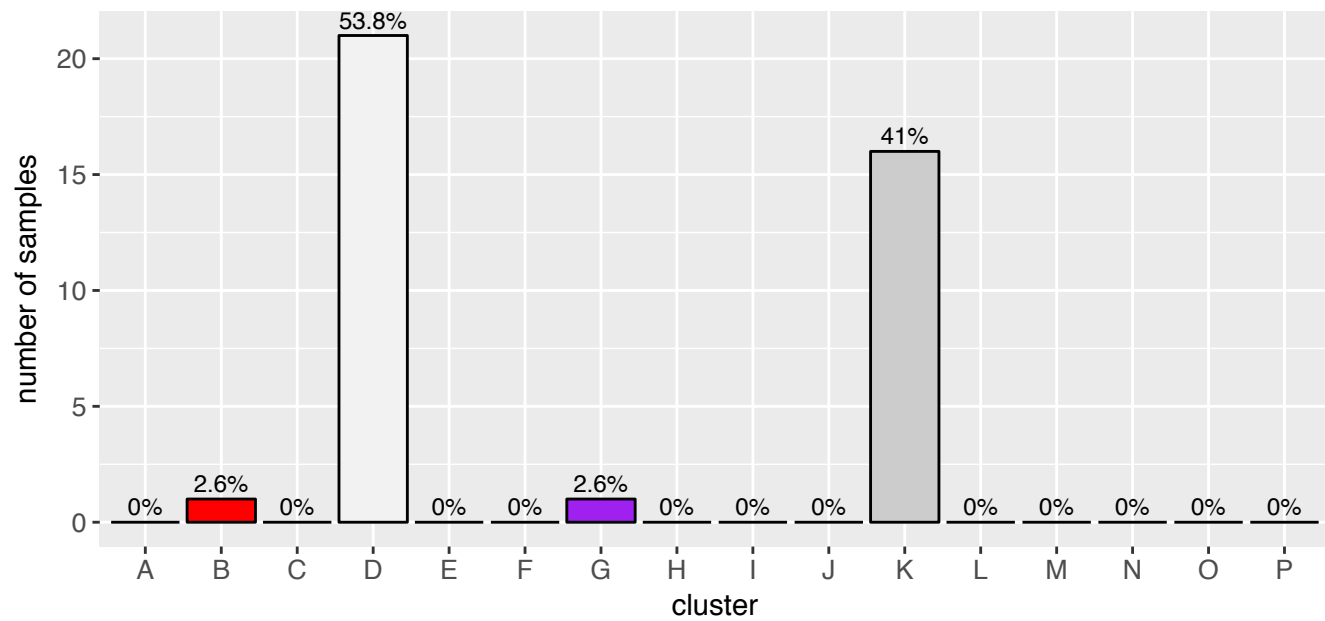

### CNS-Medullo

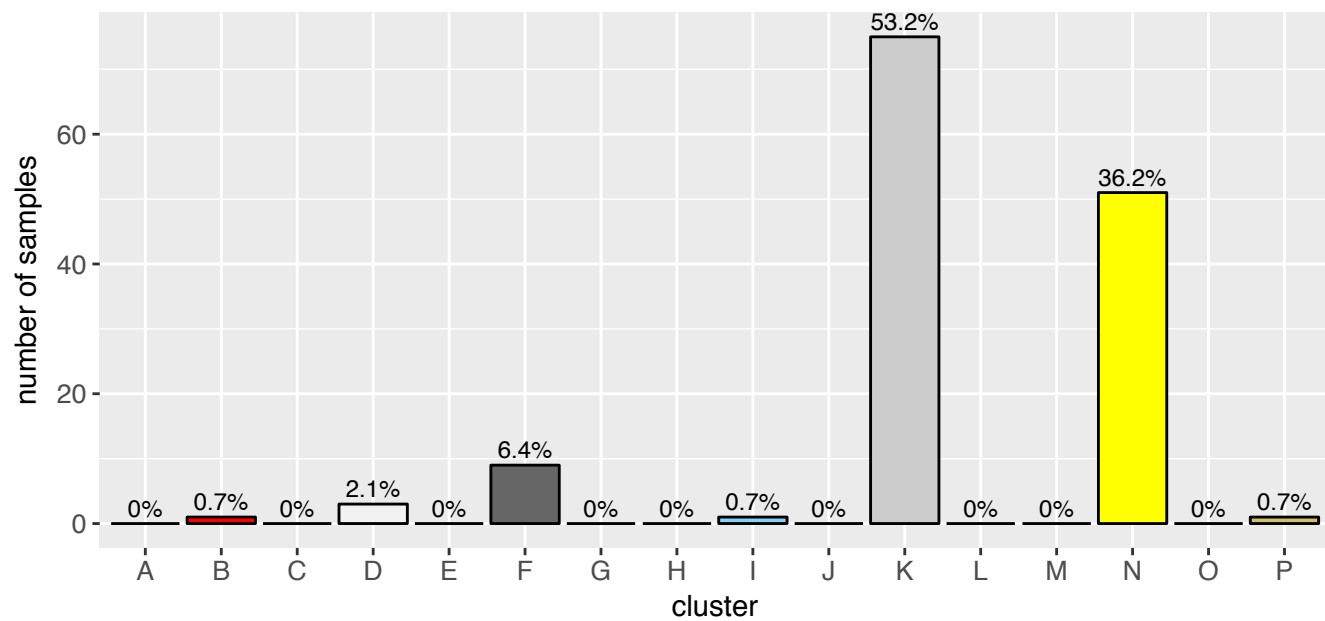

CNS-Oligo

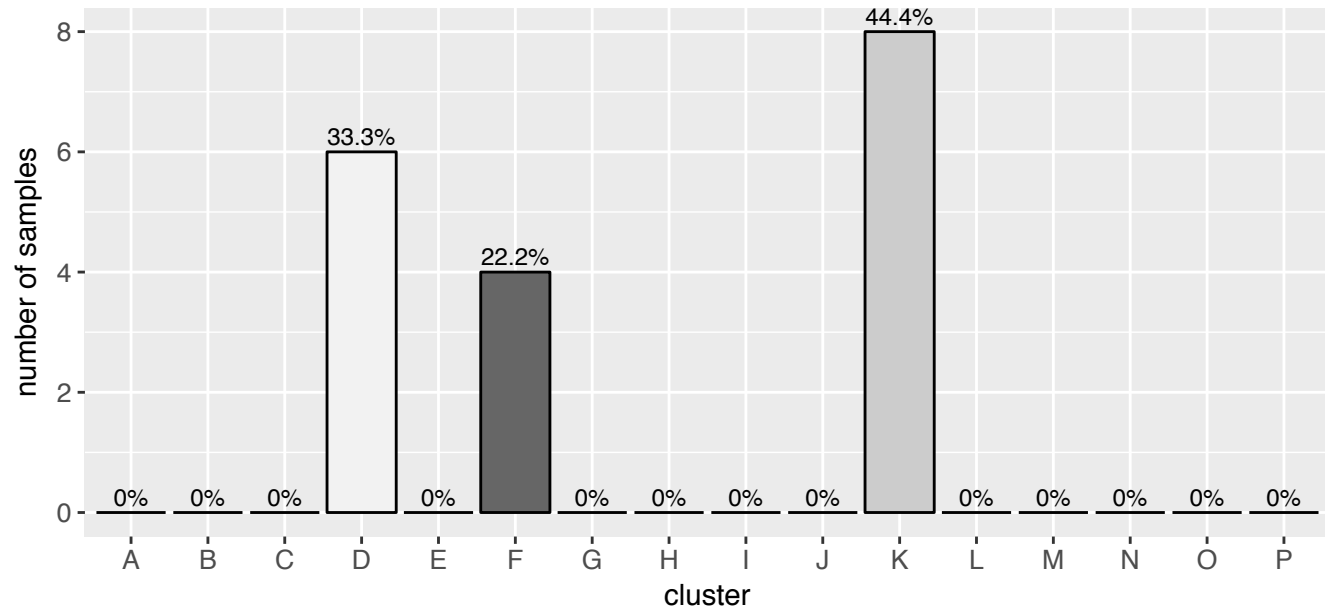

CNS-PiloAstro

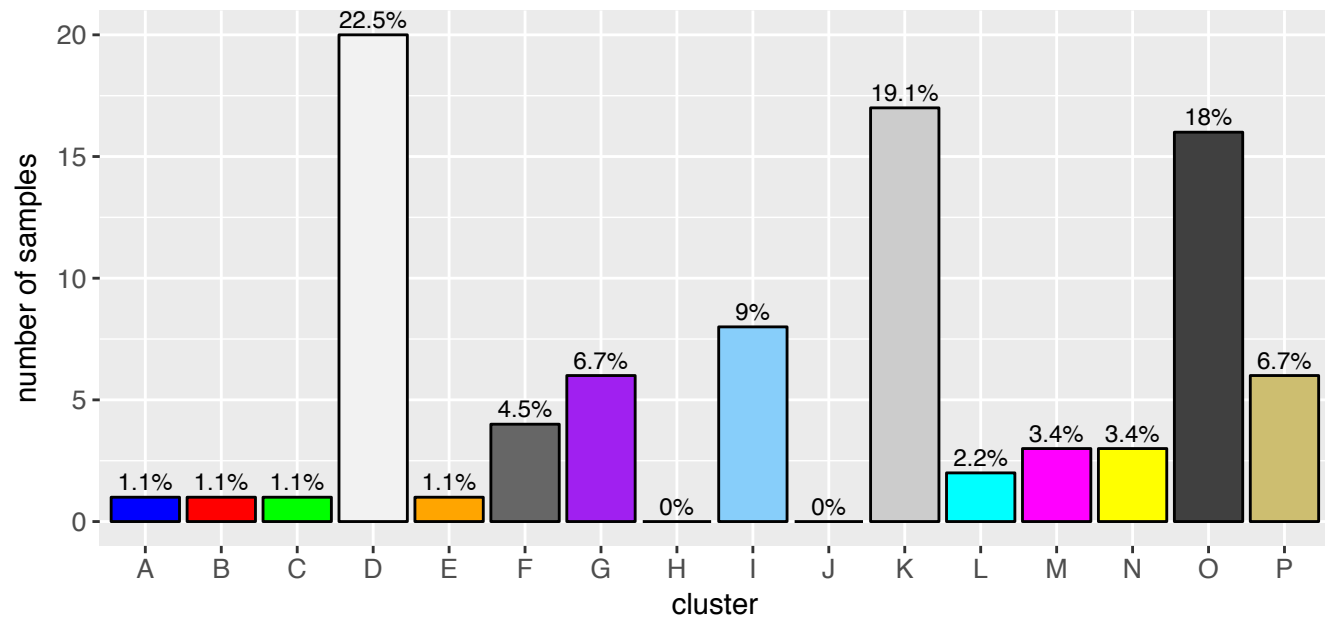

ColoRect-AdenoCA

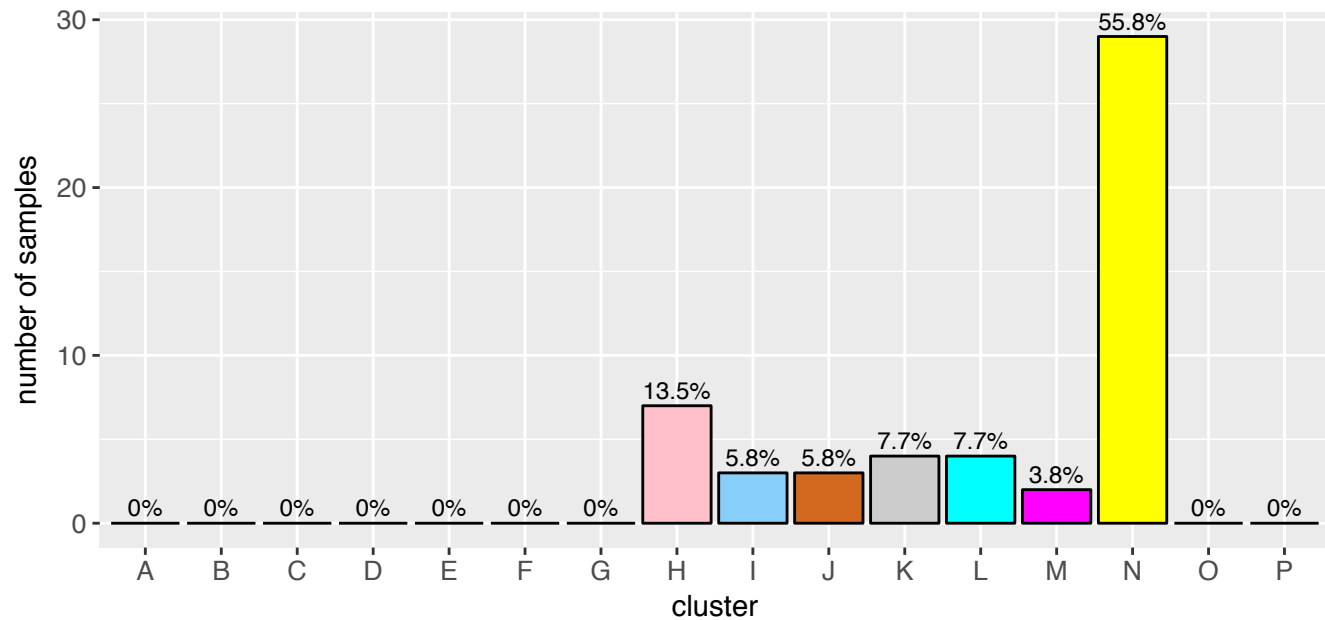

Eso-AdenoCA

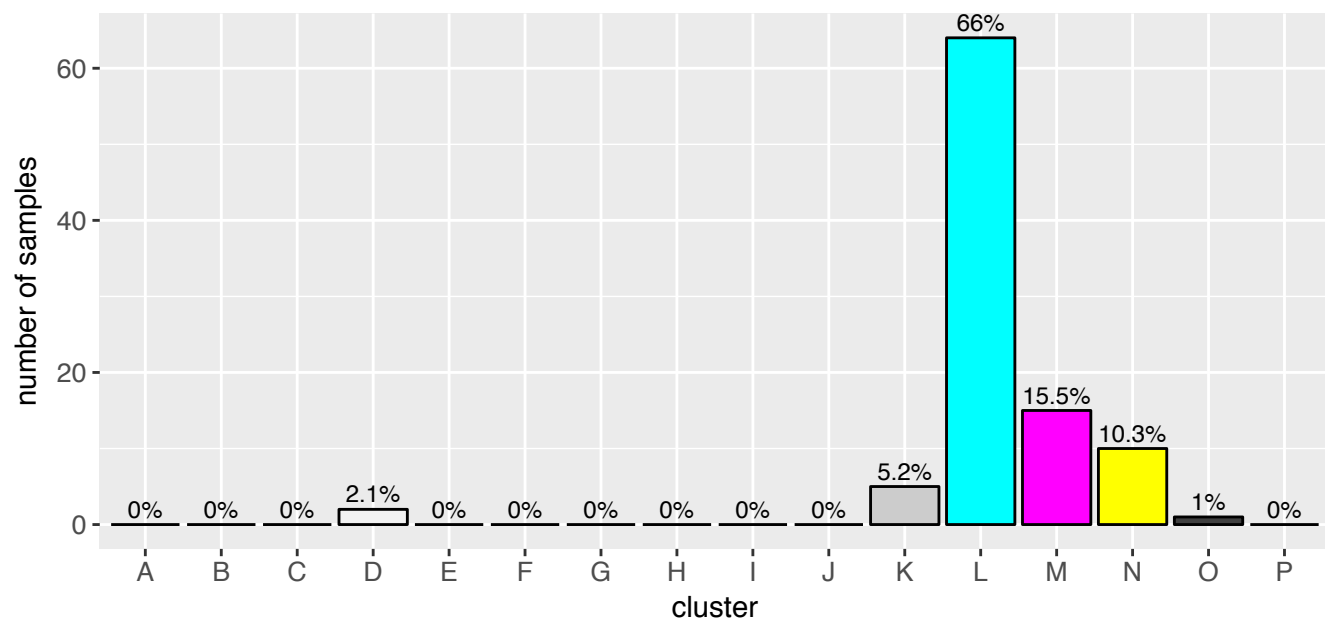



Head-SCC

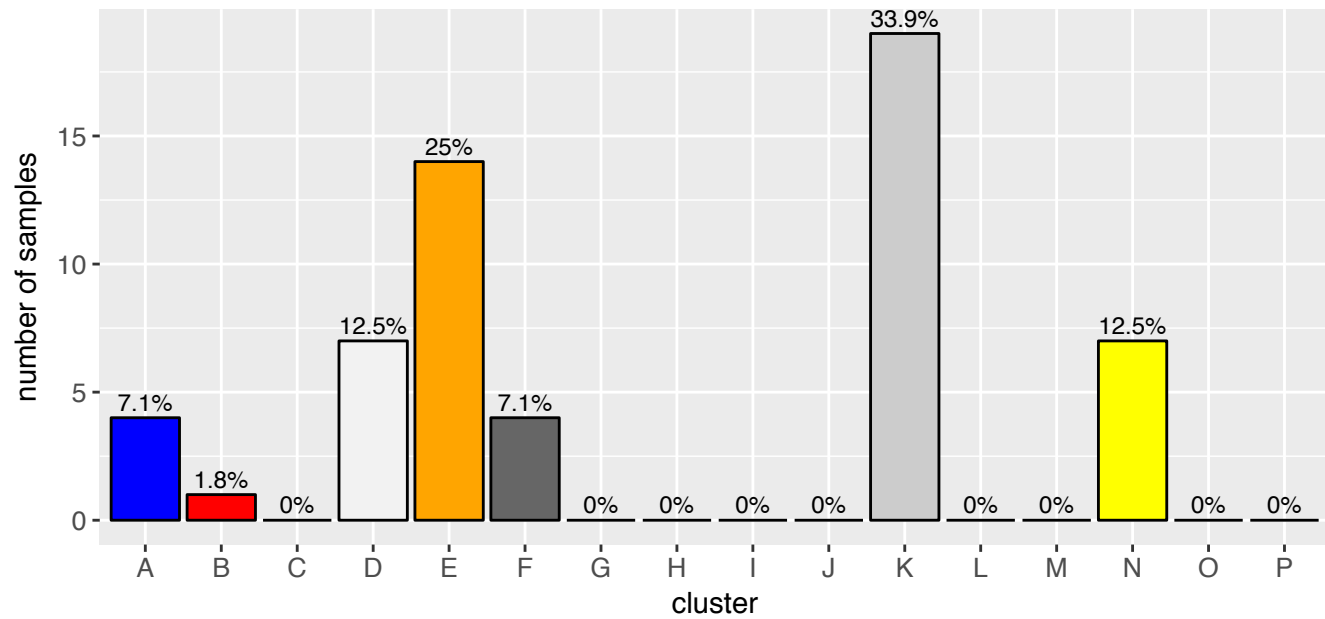

Kidney-ChRCC

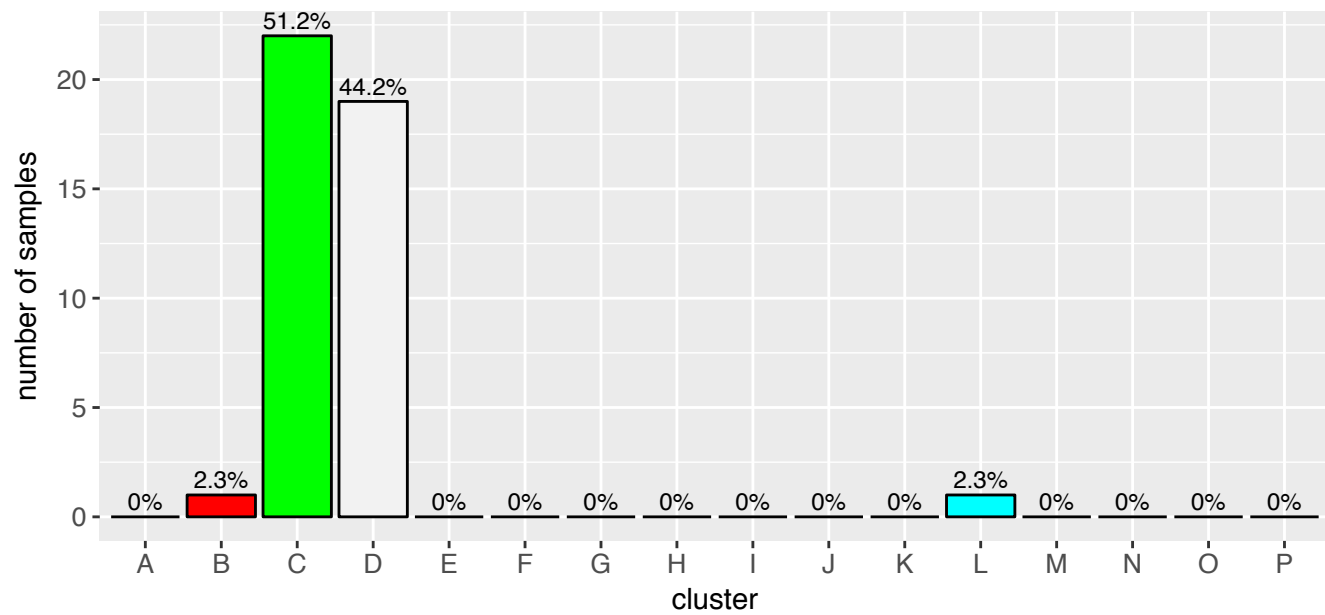

Kidney-RCC

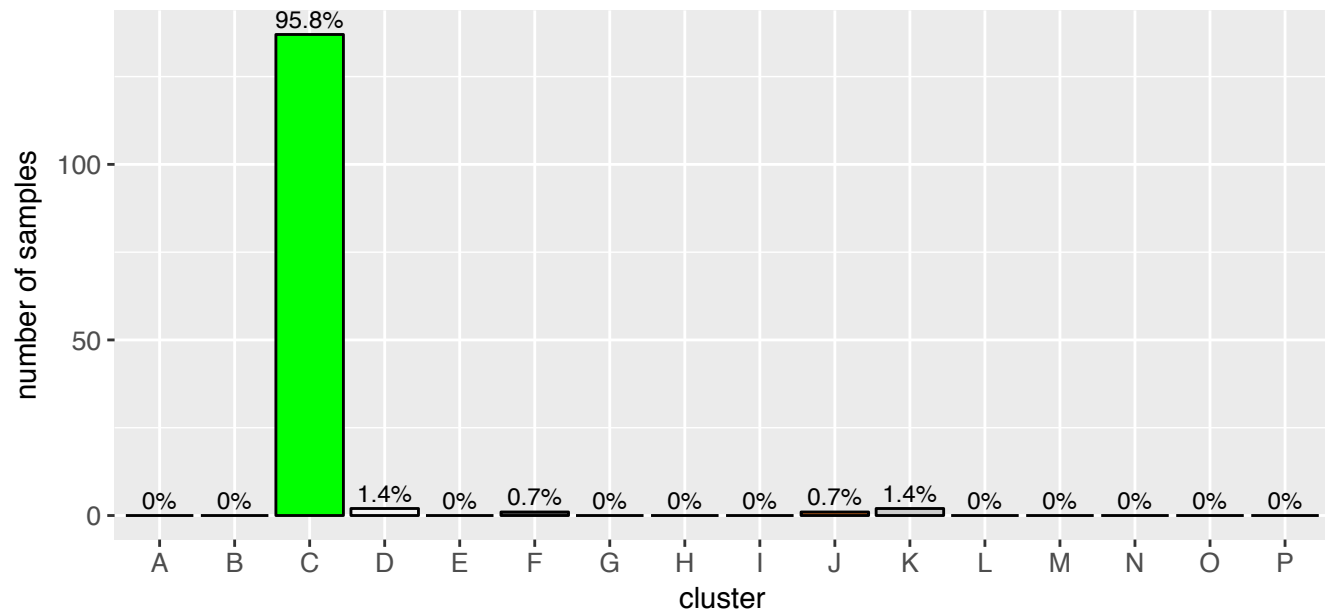

Liver-HCC

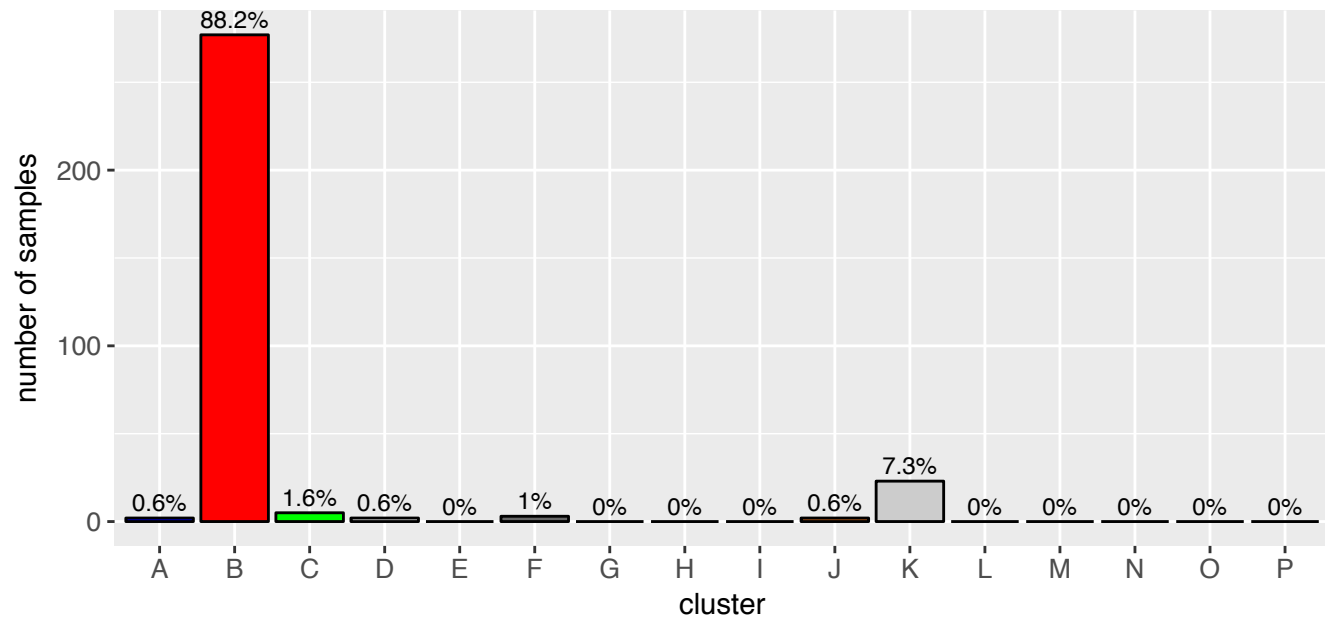

Lung-AdenoCA

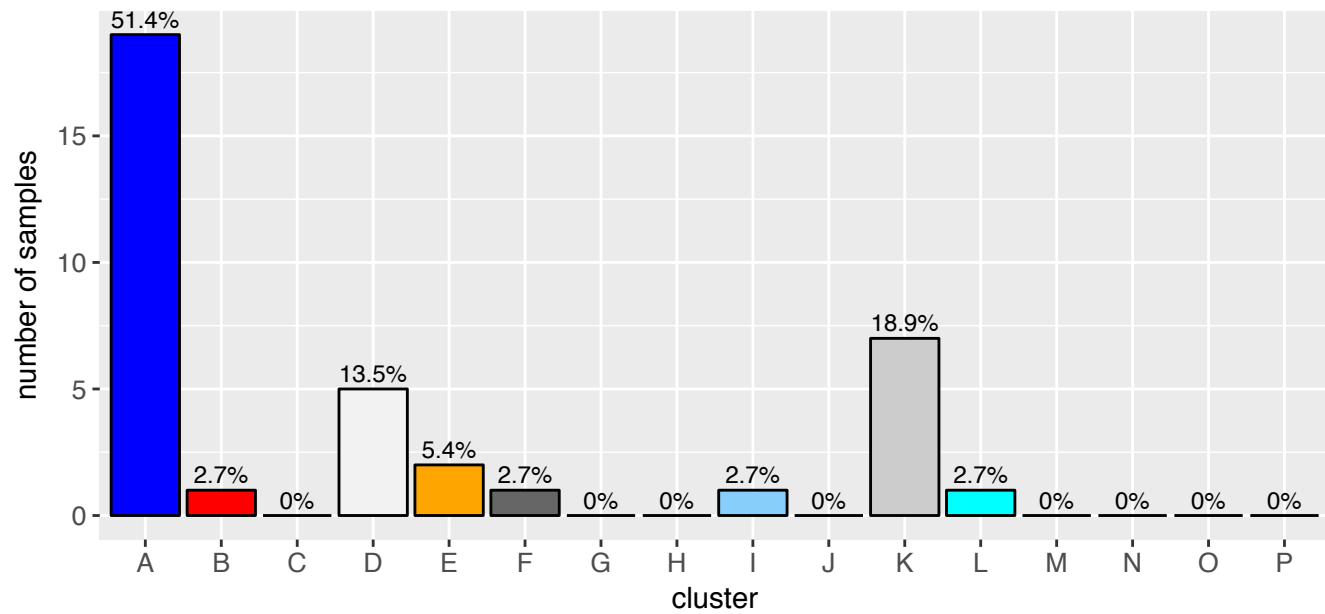

Lung-SCC

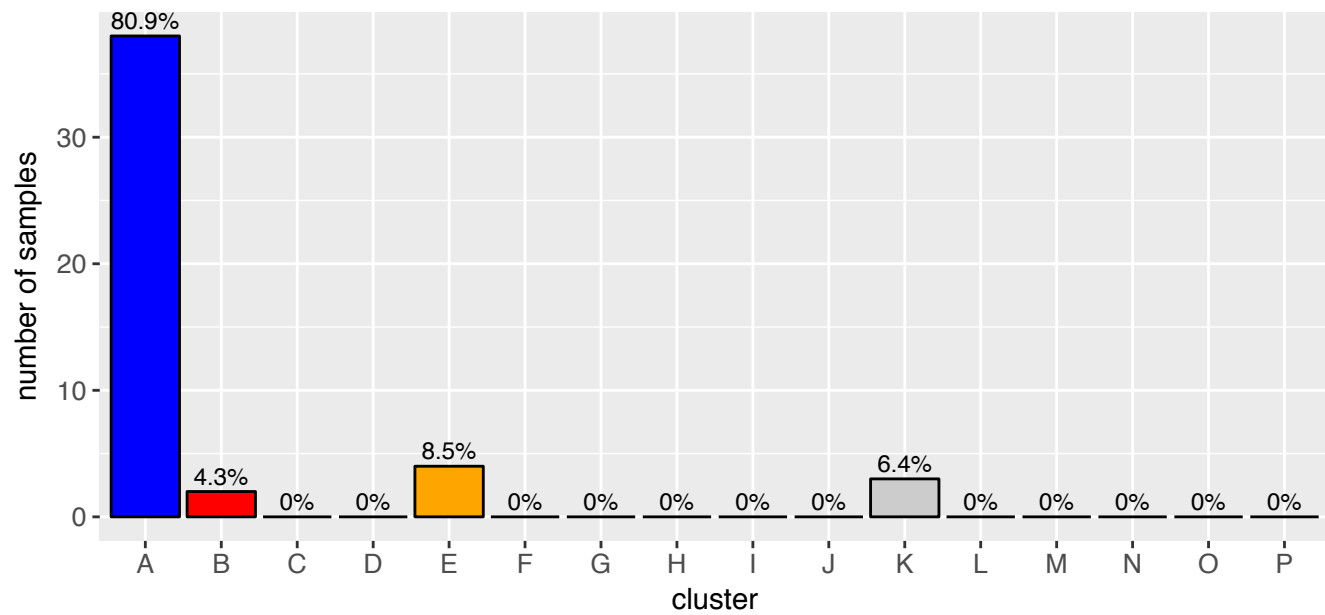

Lymph-BNHL

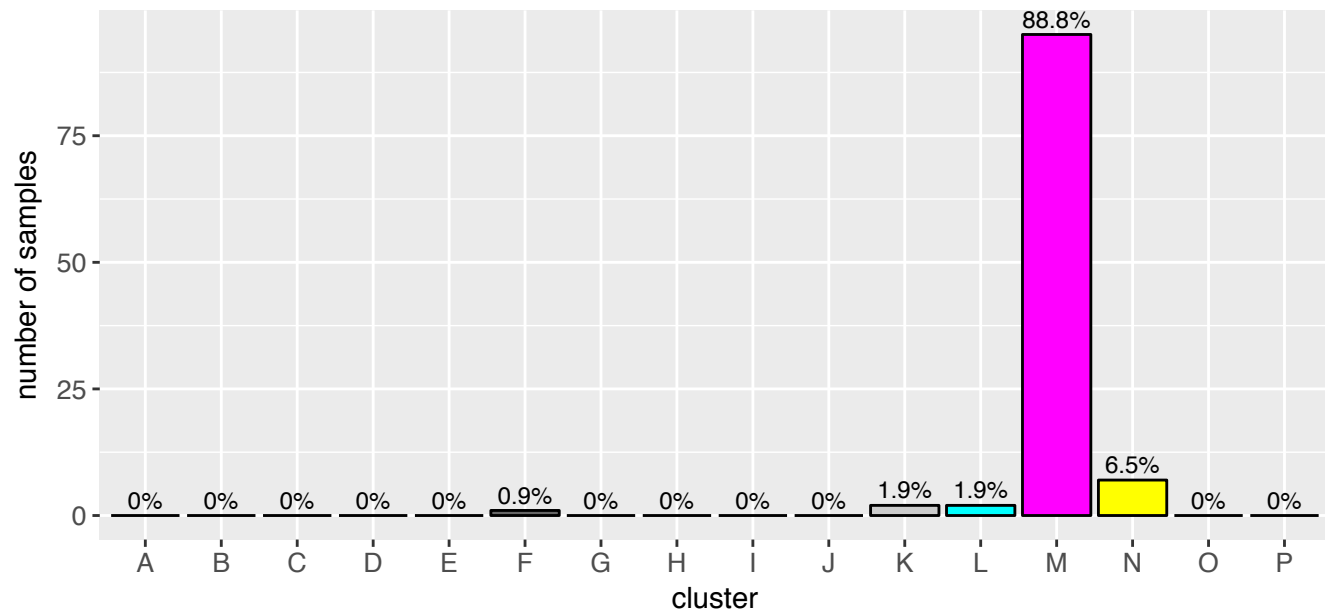

Lymph-CLL

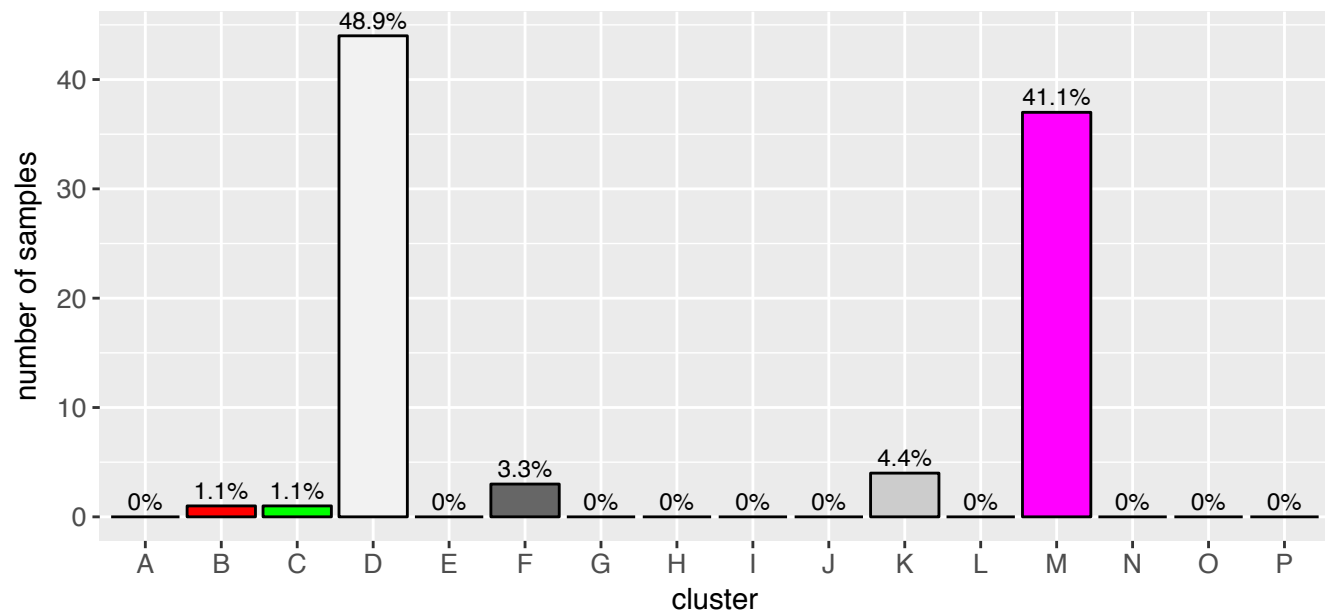

Myeloid-AML

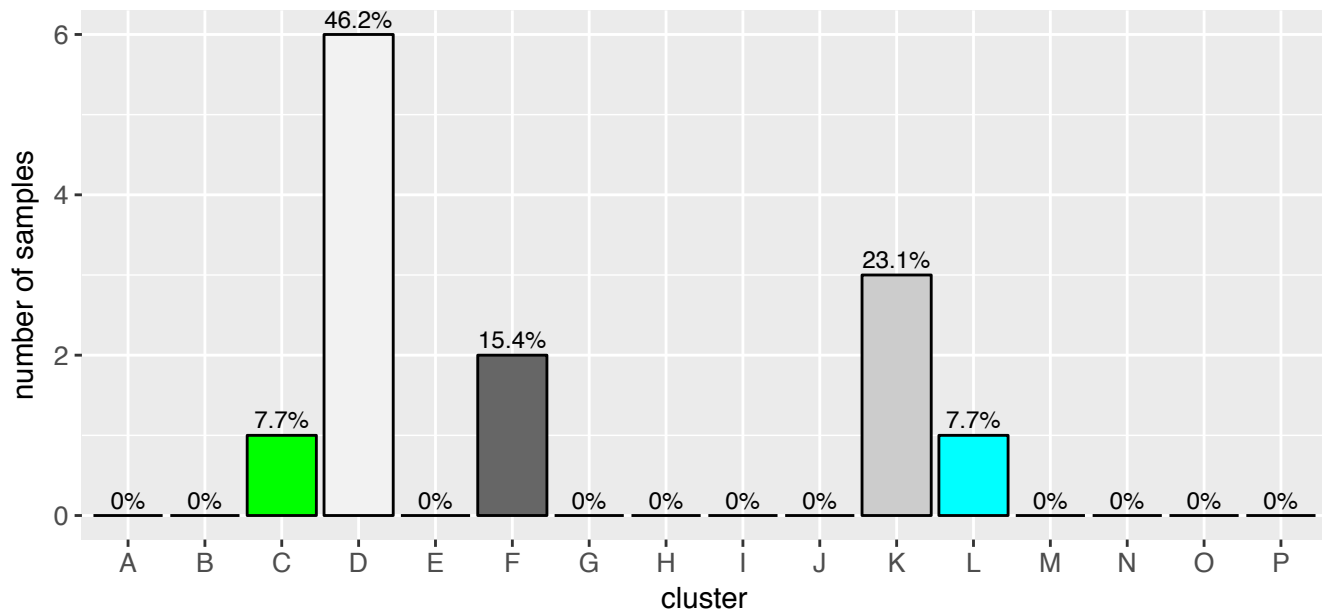

Myeloid-MDS

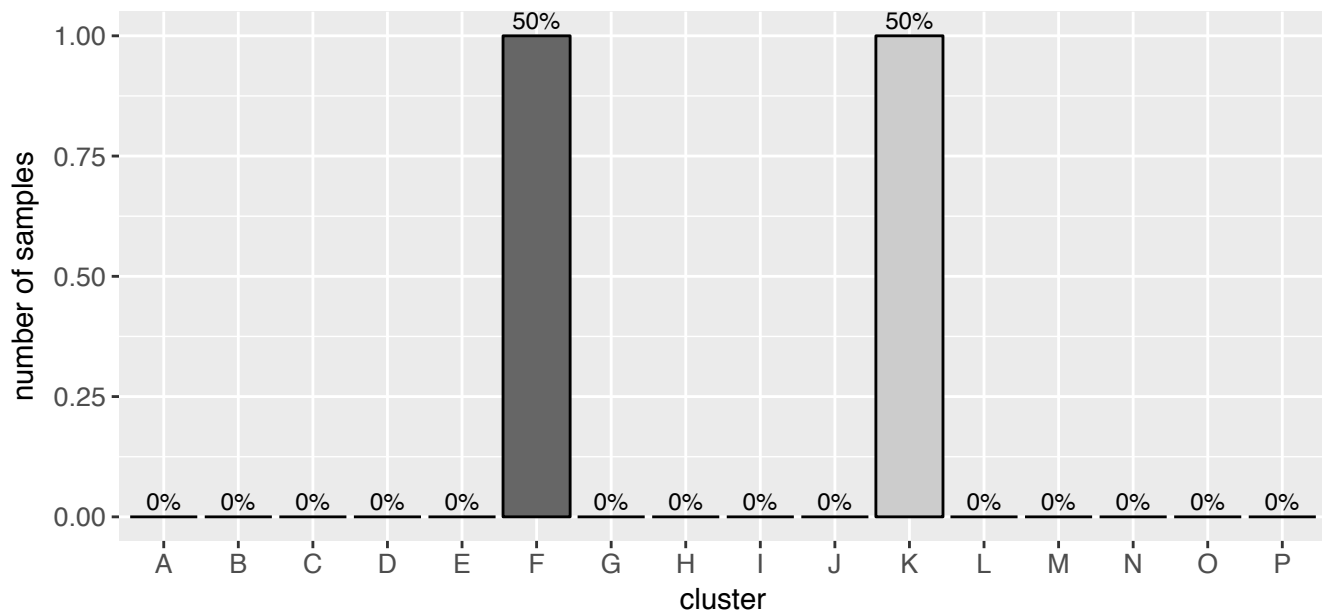

### Myeloid-MPN

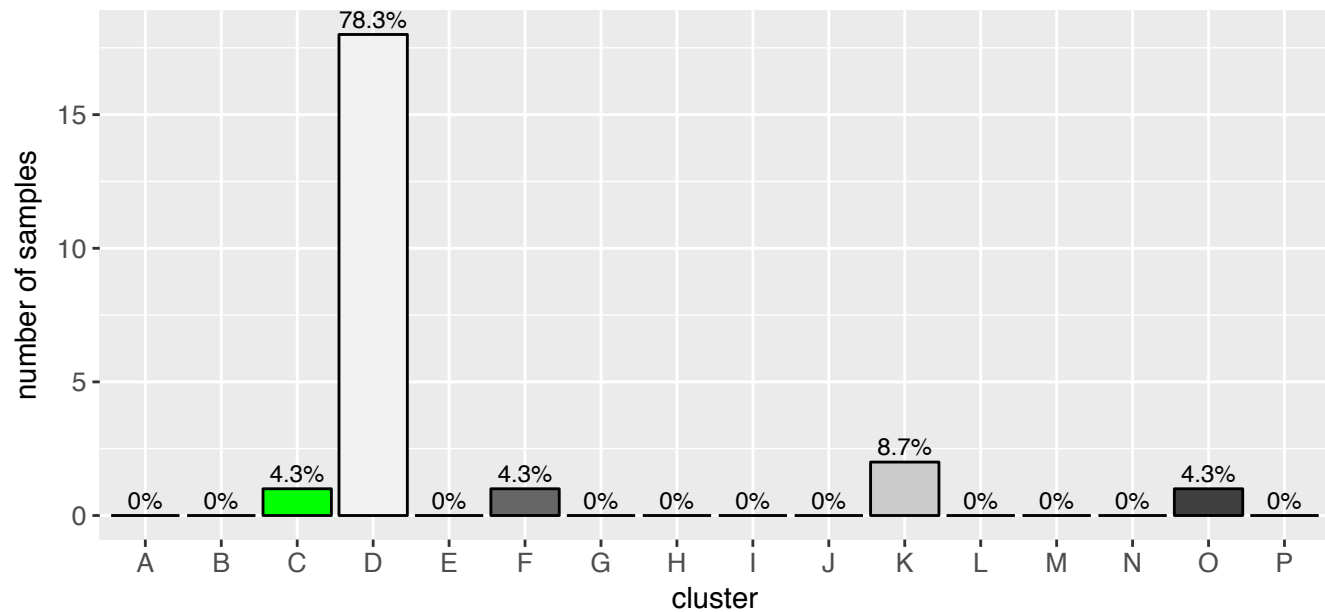

### Ovary-AdenoCA

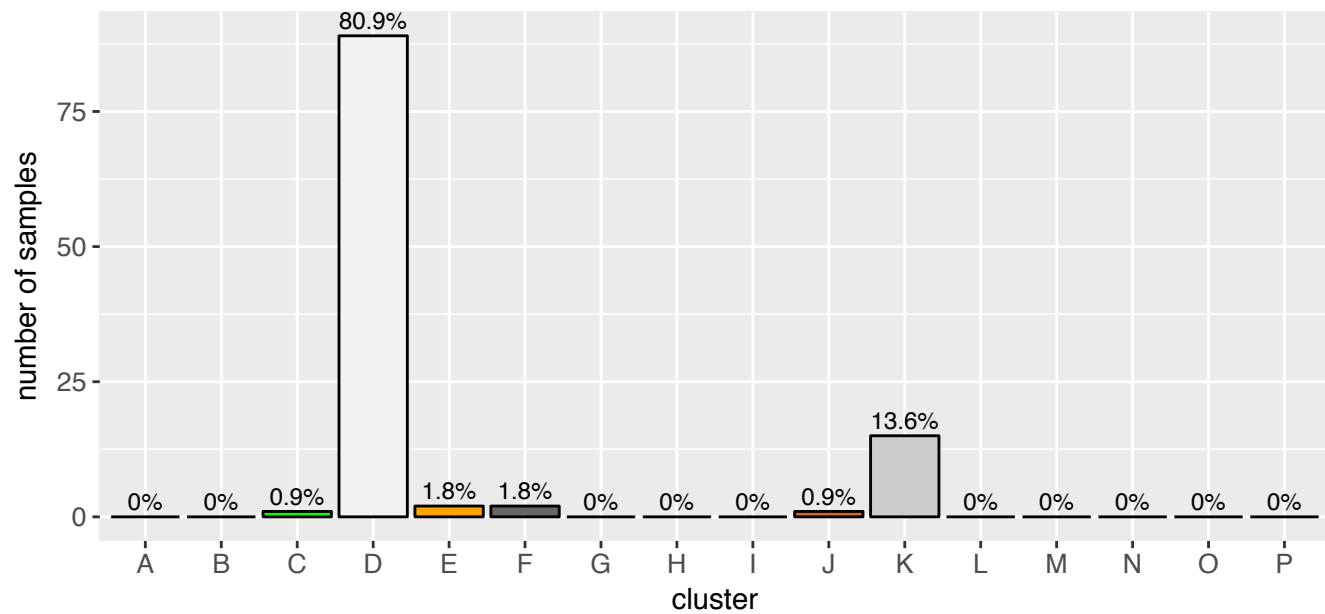

Panc-AdenoCA

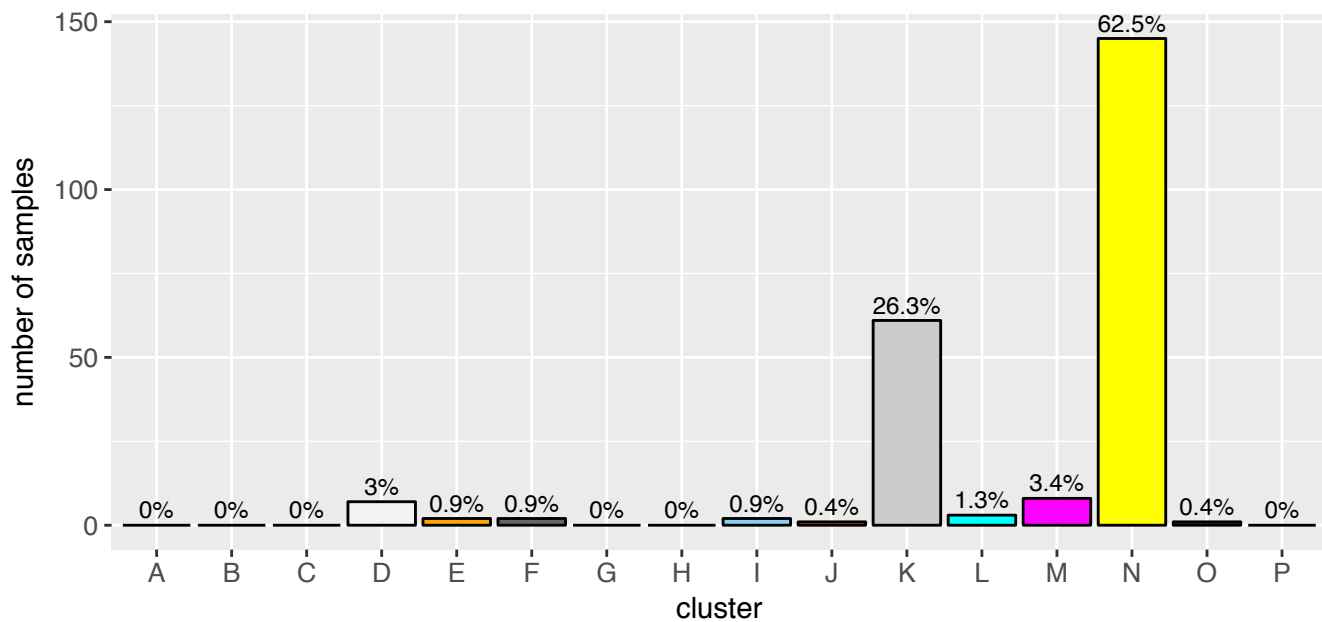

Panc-Endocrine

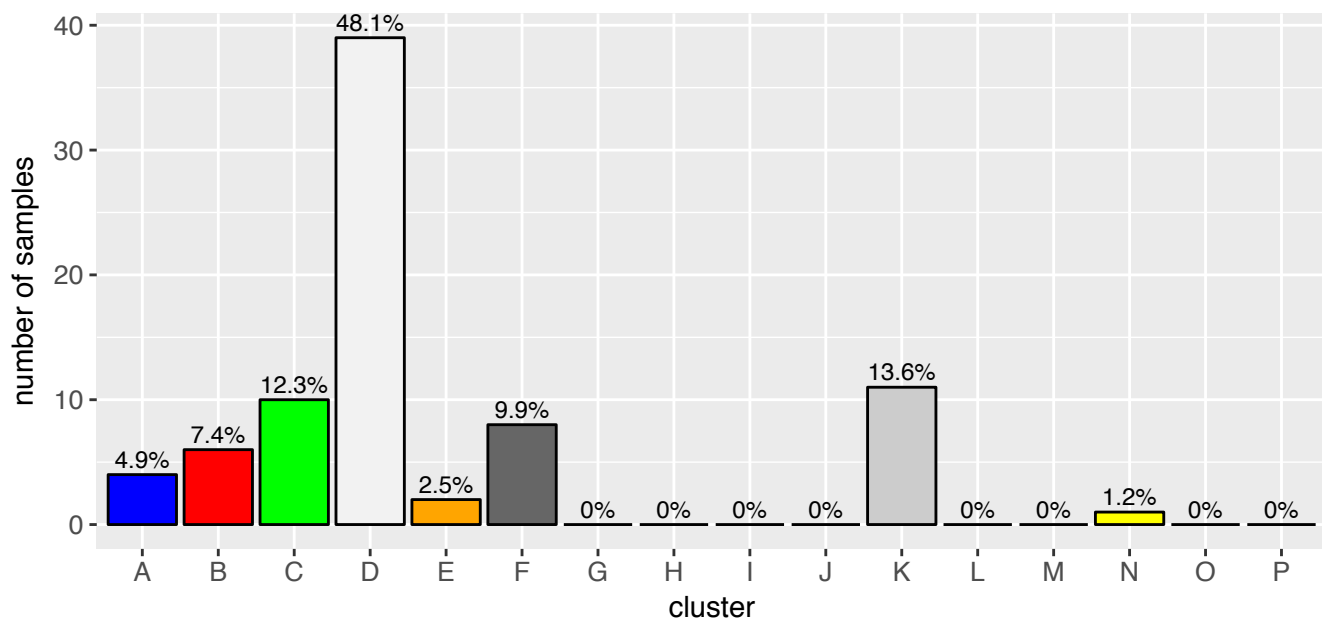

Prost-AdenoCA

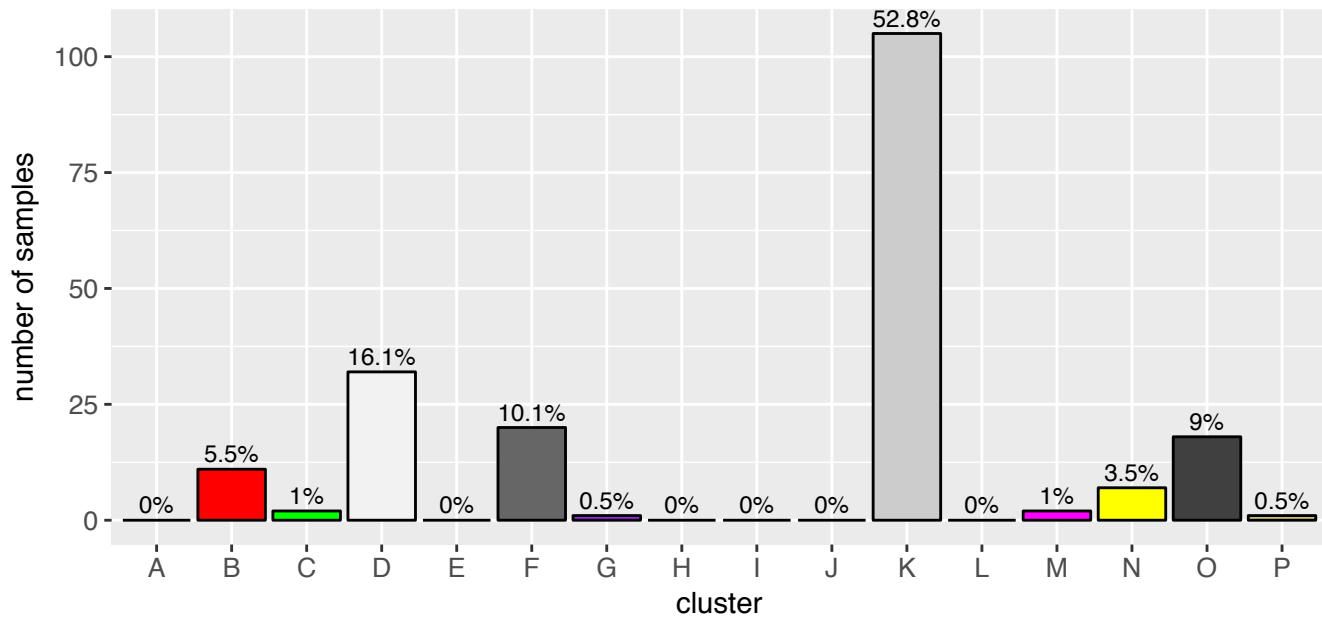

Skin-Melanoma

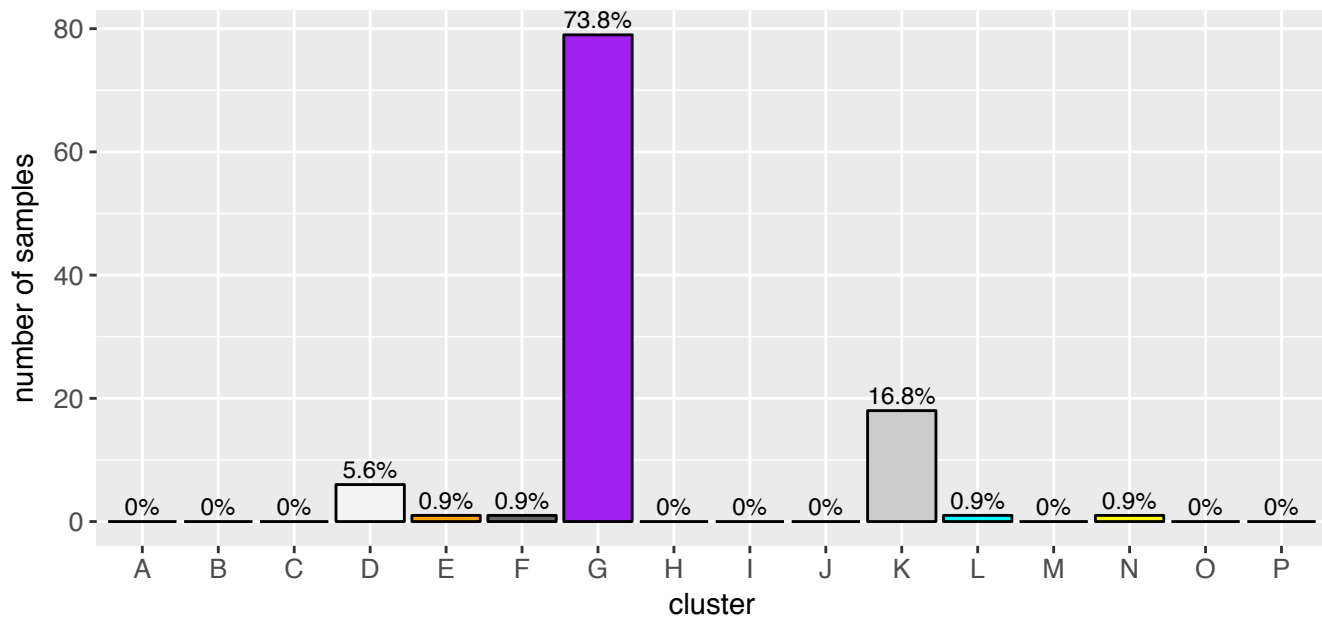



SoftTissue–Leiomyo

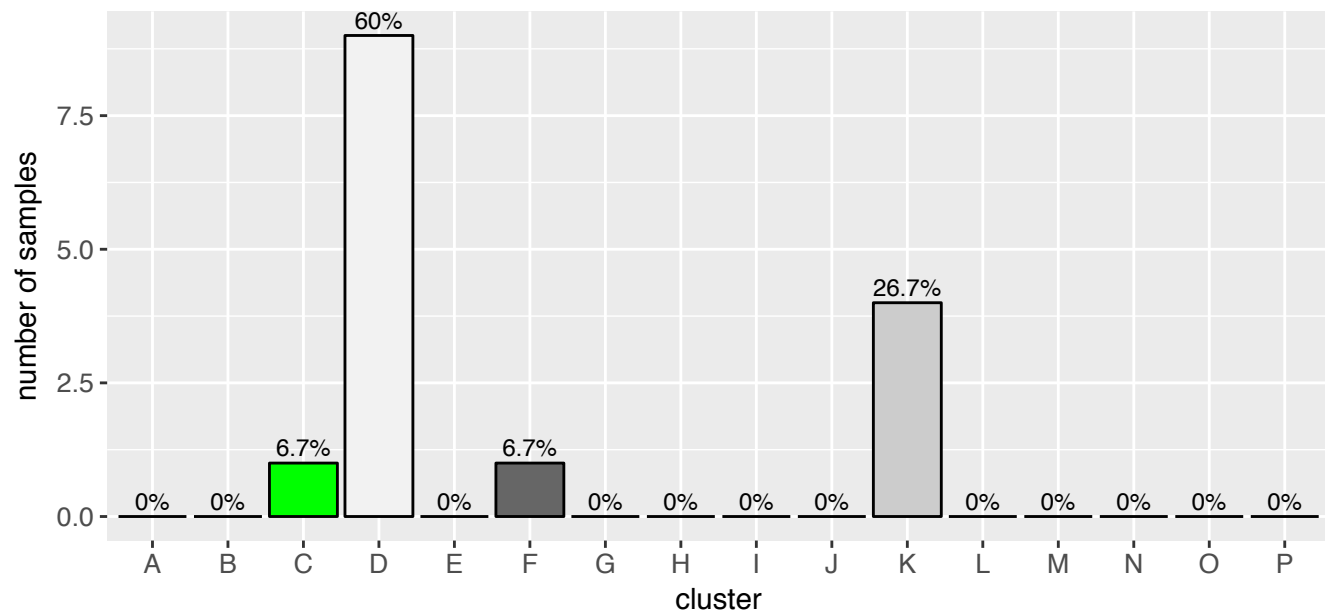

SoftTissue–Liposarc

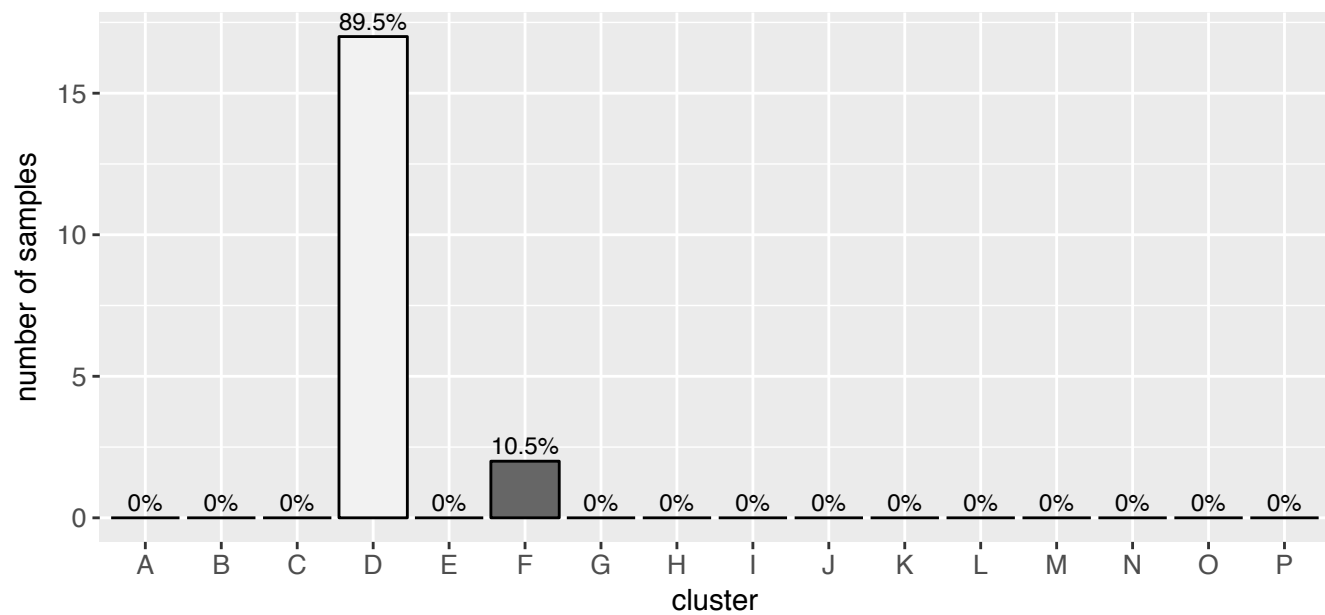

Stomach-AdenoCA

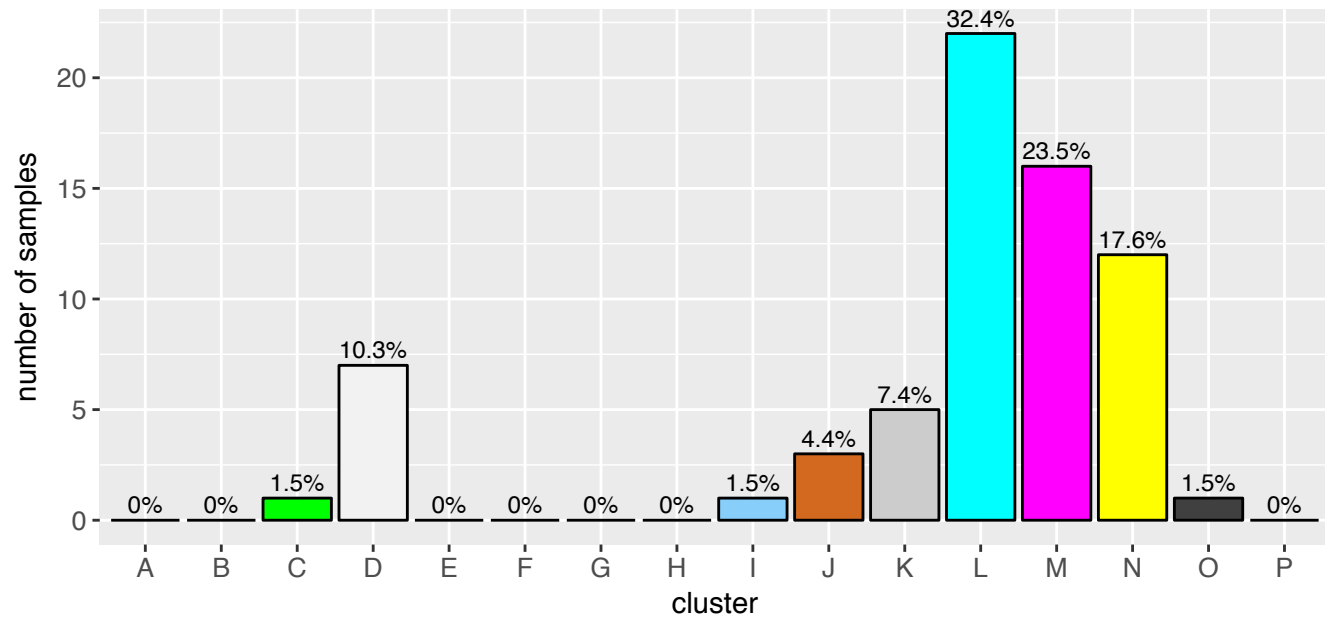

Thy-AdenoCA

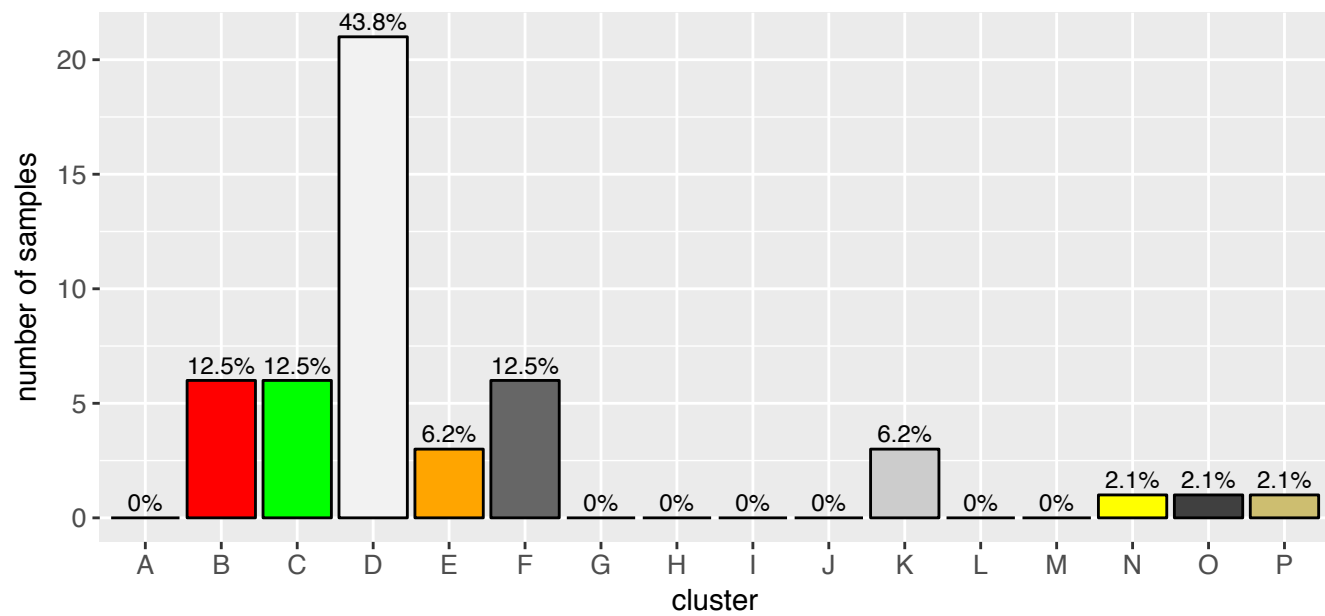

# Uterus-AdenoCA

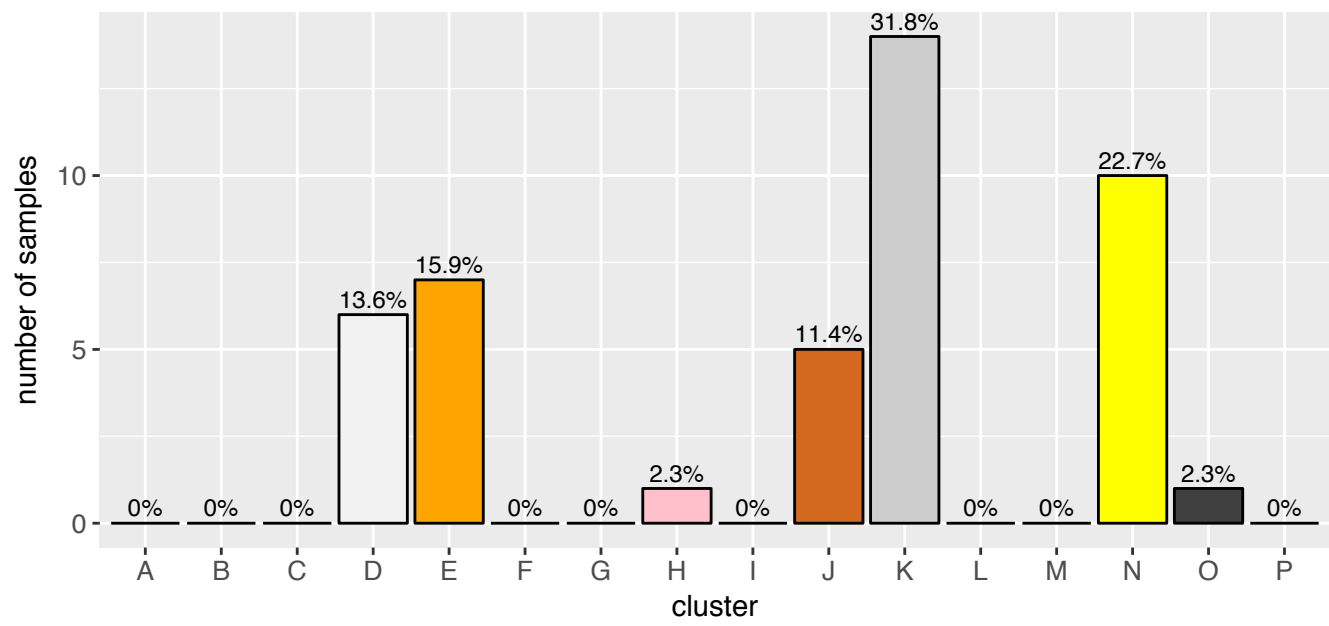

Supplement: pcbi.1007496.s012.pdf [file pcbi.1007496.s012.pdf]
