# Supplementary material for: Recurrent somatic mutations reveal new insights into consequences of mutagenic processes in cancer
Source: PubMed Central journal article supplement (PMC6901237; doi:10.1371/journal.pcbi.1007496), 2019-11-25

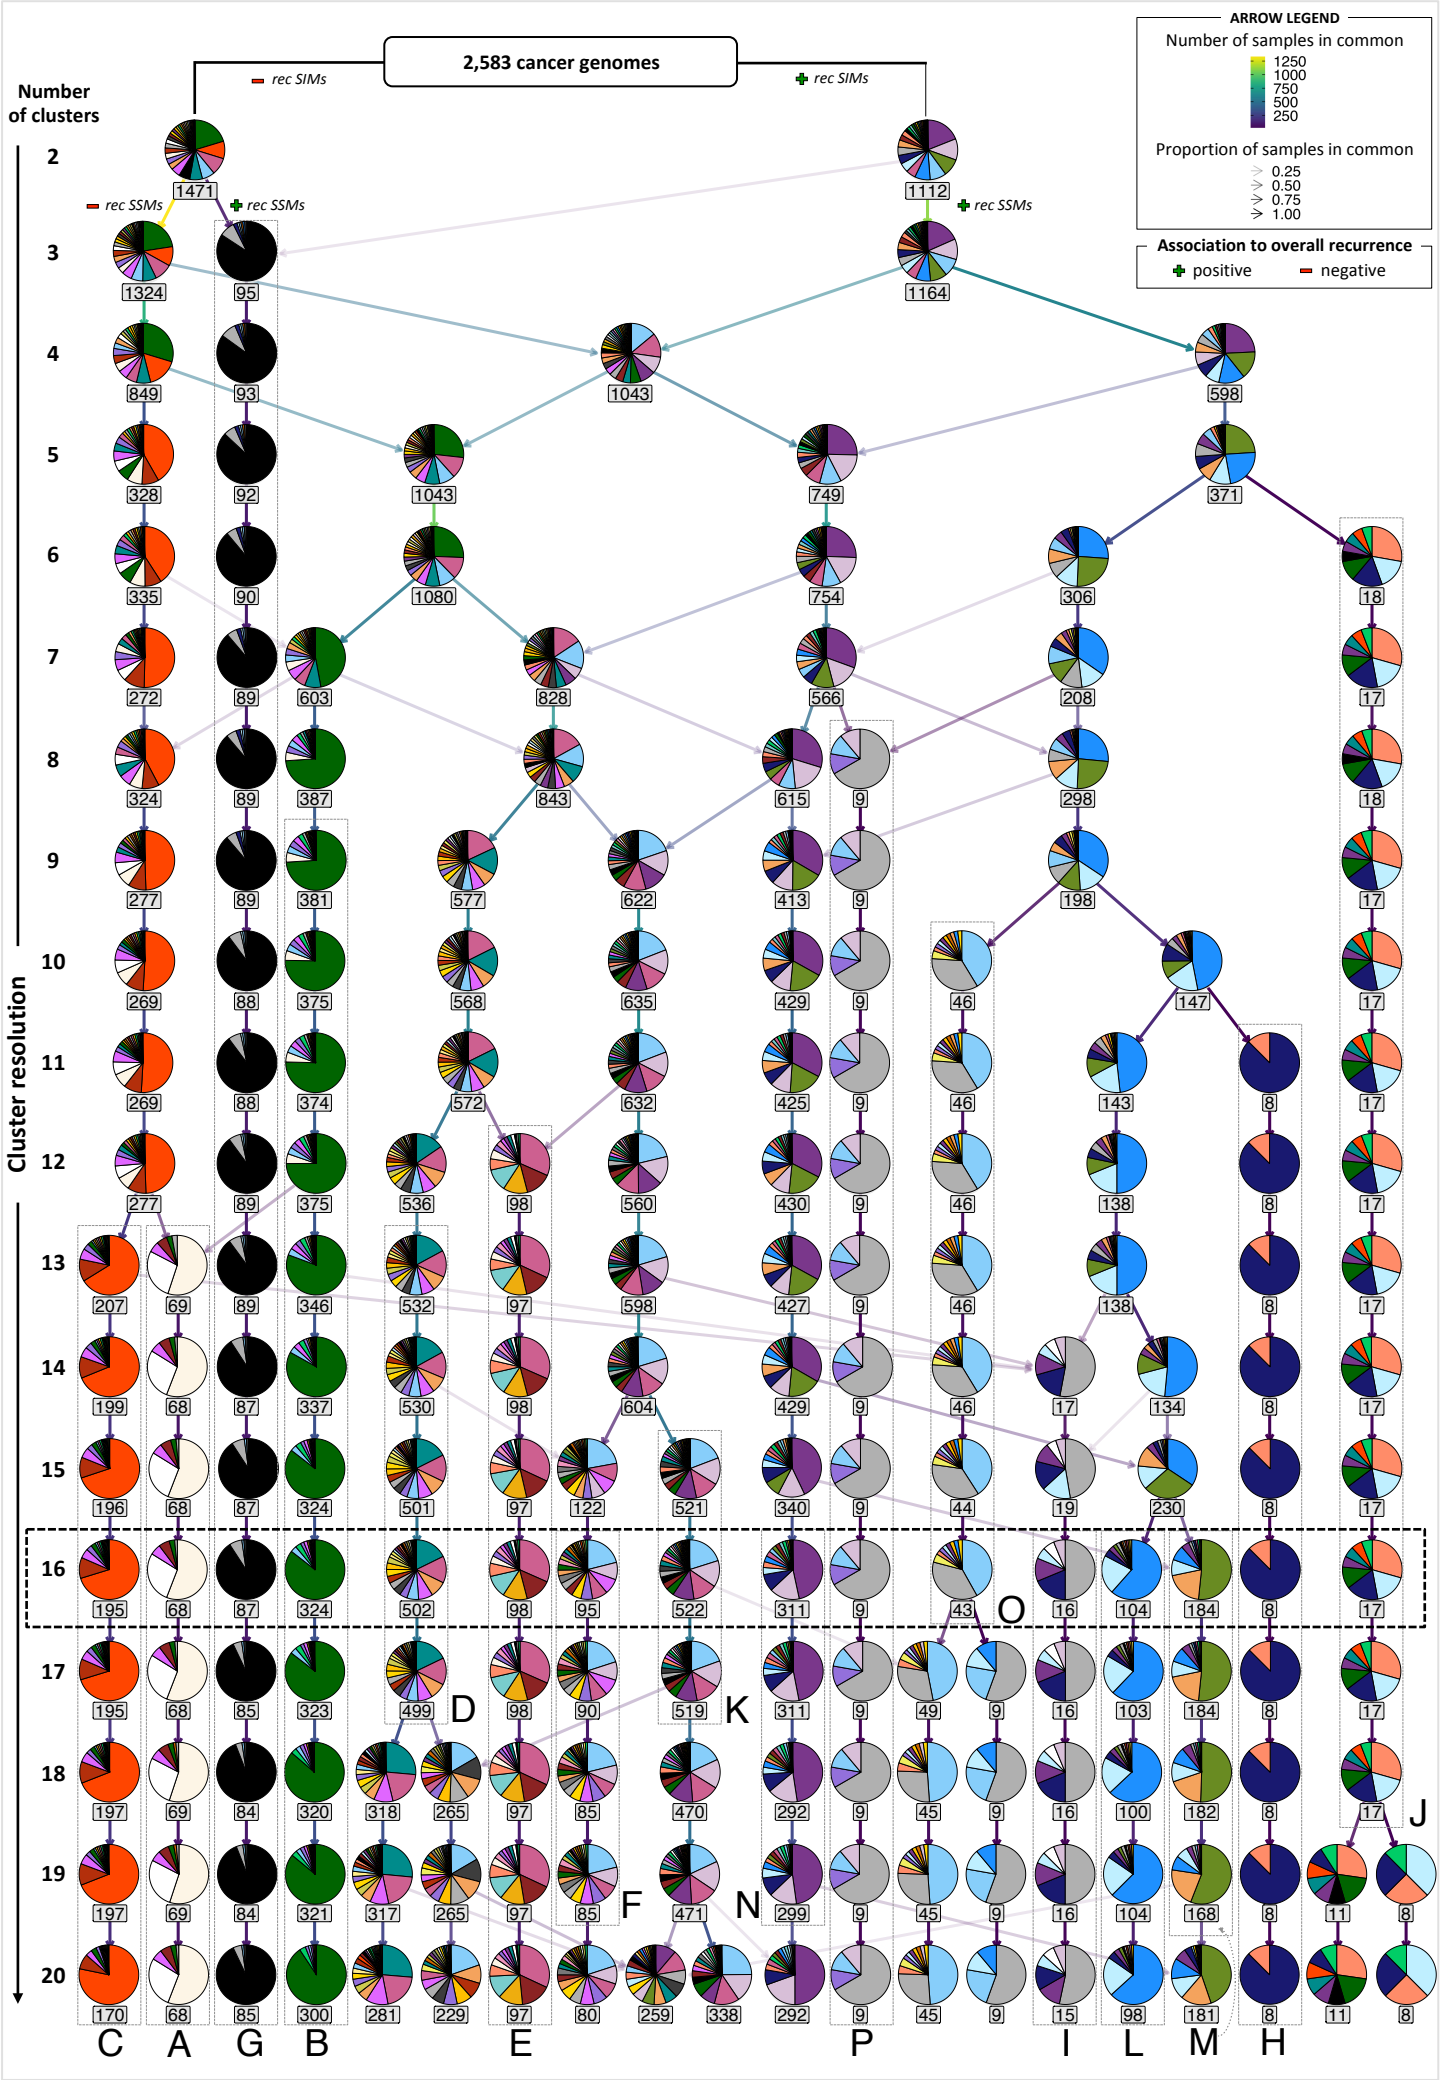

Supplement: pcbi.1007496.s001.pdf [file pcbi.1007496.s001.pdf]
