# Supplementary material for: Recurrent somatic mutations reveal new insights into consequences of mutagenic processes in cancer
Source: PubMed Central journal article supplement (PMC6901237; doi:10.1371/journal.pcbi.1007496), 2019-11-25
Supplement: pcbi.1007496.s002.pdf [file pcbi.1007496.s002.pdf]

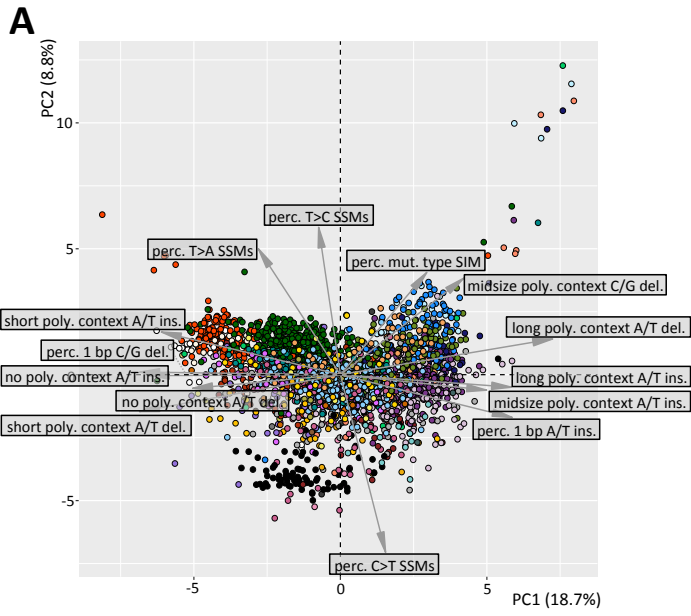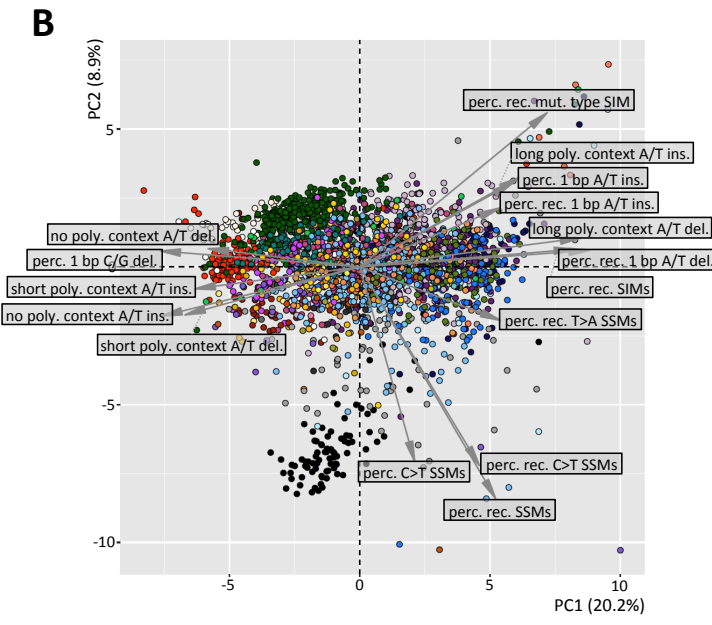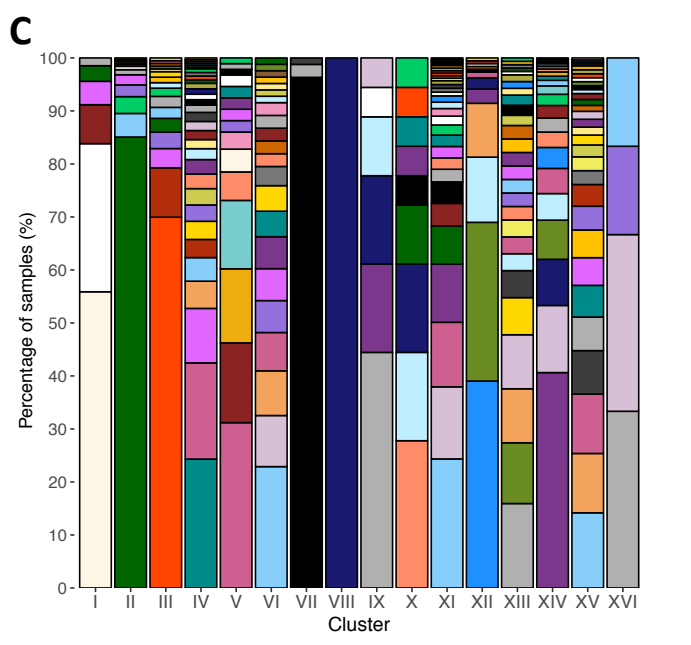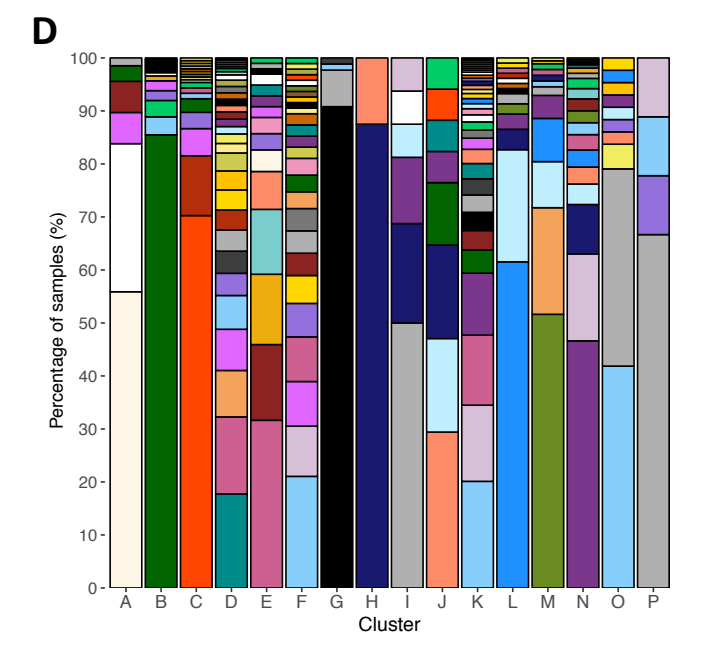

**F**

*Using only the general features*

| Cluster                                                 | I | II | III | IV | V | VI | VII | VIII | IX | X | XI | XII | XIII | XIV | XV | XVI |
|---------------------------------------------------------|---|----|-----|----|---|----|-----|------|----|---|----|-----|------|-----|----|-----|
| WITH...<br>...hypermutation of the immunoglobulin genes | 0 | 0  | 0   | 2  | 0 | 6  | 0   | 0    | 0  | 0 | 0  | 19  | 8    | 2   | 3  | 0   |
| WITHOUT...                                              | 0 | 0  | 0   | 13 | 0 | 0  | 0   | 0    | 0  | 0 | 1  | 0   | 8    | 0   | 27 | 0   |

*Using the general and recurrence-related features*

| Cluster                                                 | A | B | C | D  | E | F | G | H | I | J | K | L | M  | N | O | P |
|---------------------------------------------------------|---|---|---|----|---|---|---|---|---|---|---|---|----|---|---|---|
| WITH...<br>...hypermutation of the immunoglobulin genes | 0 | 0 | 0 | 2  | 0 | 2 | 0 | 0 | 0 | 0 | 0 | 0 | 36 | 0 | 0 | 0 |
| WITHOUT...                                              | 0 | 1 | 1 | 42 | 0 | 0 | 0 | 0 | 0 | 0 | 4 | 0 | 1  | 0 | 0 | 0 |
