# Supplementary material for: Recurrent somatic mutations reveal new insights into consequences of mutagenic processes in cancer
Source: PubMed Central journal article supplement (PMC6901237; doi:10.1371/journal.pcbi.1007496), 2019-11-25
Supplement: pcbi.1007496.s005.pdf [file pcbi.1007496.s005.pdf]

**Table S1. Tumour type abbreviation, full name and number of samples.**

| <b>Abbreviation</b> | <b>Full name</b>                                 | <b>Number of samples</b> |
|---------------------|--------------------------------------------------|--------------------------|
| Biliary-AdenoCA     | biliary adenocarcinoma                           | 34                       |
| Bladder-TCC         | bladder transitional cell carcinoma              | 23                       |
| Bone-Benign         | benign neoplasm of the bone                      | 16                       |
| Bone-Epith          | epithelial neoplasm of bone                      | 10                       |
| Bone-Osteosarc      | bone osteosarcoma                                | 35                       |
| Breast-AdenoCA      | breast adenocarcinoma                            | 195                      |
| Breast-DCIS         | breast ductal carcinoma in situ                  | 3                        |
| Breast-LobularCA    | breast lobular carcinoma                         | 13                       |
| Cervix-AdenoCA      | cervical adenocarcinoma                          | 2                        |
| Cervix-SCC          | cervical squamous cell carcinoma                 | 18                       |
| CNS-GBM             | central nervous system - glioblastoma multiforme | 39                       |
| CNS-Medullo         | central nervous system - medulloblastoma         | 141                      |
| CNS-Oligo           | central nervous system - oligodendroglioma       | 18                       |
| CNS-PiloAstro       | central nervous system - pilocytic astrocytoma   | 89                       |
| ColoRect-AdenoCA    | colorectal adenocarcinoma                        | 52                       |
| Eso-AdenoCA         | oesophageal adenocarcinoma                       | 97                       |
| Head-SCC            | head/neck squamous cell carcinoma                | 56                       |
| Kidney-ChRCC        | chromophobe renal cell carcinoma                 | 43                       |
| Kidney-RCC          | renal cell carcinoma                             | 143                      |
| Liver-HCC           | hepatocellular carcinoma                         | 314                      |
| Lung-AdenoCA        | lung adenocarcinoma                              | 37                       |
| Lung-SCC            | lung squamous cell carcinoma                     | 47                       |
| Lymph-BNHL          | B-cell non-Hodgkin lymphoma                      | 107                      |
| Lymph-CLL           | chronic lymphocytic leukaemia                    | 90                       |
| Myeloid-AML         | acute myeloid leukaemia                          | 13                       |
| Myeloid-MDS         | myelodysplastic syndromes                        | 2                        |
| Myeloid-MPN         | myeloproliferative neoplasm                      | 23                       |
| Ovary-AdenoCA       | ovarian adenocarcinoma                           | 110                      |
| Panc-AdenoCA        | pancreatic adenocarcinoma                        | 232                      |
| Panc-Endocrine      | pancreatic endocrine neoplasm                    | 81                       |
| Prost-AdenoCA       | prostate adenocarcinoma                          | 199                      |
| Skin-Melanoma       | skin melanoma                                    | 107                      |
| SoftTissue-Leiomyo  | soft tissue leiomyosarcoma                       | 15                       |
| SoftTissue-Liposarc | soft tissue liposarcoma                          | 19                       |
| Stomach-AdenoCA     | stomach adenocarcinoma                           | 68                       |
| Thy-AdenoCA         | thyroid adenocarcinoma                           | 48                       |
| Uterus-AdenoCA      | uterus adenocarcinoma                            | 44                       |
