# Supplementary material for: Recurrent somatic mutations reveal new insights into consequences of mutagenic processes in cancer
Source: PubMed Central journal article supplement (PMC6901237; doi:10.1371/journal.pcbi.1007496), 2019-11-25
Supplement: pcbi.1007496.s006.pdf [file pcbi.1007496.s006.pdf]

**Table S2. Recurrence in pan-cancer context and within tumour type(s).**

| <b>Recurrent in</b>     | <b>Unique to tumour type(s) in which it is recurrent</b> | <b>Percentage of recurrent</b> |             |
|-------------------------|----------------------------------------------------------|--------------------------------|-------------|
|                         |                                                          | <b>SSMs</b>                    | <b>SIMs</b> |
| pan-cancer context only |                                                          | 37.1%                          | 79.8%       |
| single tumour type      | Yes                                                      | 60.0%                          | 10.7%       |
|                         | No                                                       | 2.8%                           | 8.2%        |
| multiple tumour types   | Yes                                                      | 0.1%                           | 0.3%        |
|                         | No                                                       | 0.05%                          | 1.0%        |

Overview of the percentages of SSMs and SIMs that are recurrent in a pan-cancer setting only, within a single tumour type and in multiple tumour types.
